# 1 **Evolution of brilliant iridescent feather nanostructures**

2 Klara K. Nordén<sup>1</sup>, Chad M. Eliason<sup>2</sup>, Mary Caswell Stoddard<sup>1</sup>

3 <sup>1</sup>Department of Ecology and Evolutionary Biology, Princeton University, Princeton, NJ

4 08544, USA

5 <sup>2</sup>Grainger Bioinformatics Center, Field Museum of Natural History, Chicago, IL 60605, USA

6

## 7 **Abstract**

8 The brilliant iridescent plumage of birds creates some of the most stunning color displays  
9 known in the natural world. Iridescent plumage colors are produced by nanostructures in  
10 feathers and have evolved in a wide variety of birds. The building blocks of these  
11 structures—melanosomes (melanin-filled organelles)—come in a variety of forms, yet how  
12 these different forms contribute to color production across birds remains unclear. Here, we  
13 leverage evolutionary analyses, optical simulations and reflectance spectrophotometry to  
14 uncover general principles that govern the production of brilliant iridescence. We find that a  
15 key feature that unites all melanosome forms in brilliant iridescent structures is thin melanin  
16 layers. Birds have achieved this in multiple ways: by decreasing the size of the melanosome  
17 directly, by hollowing out the interior, or by flattening the melanosome into a platelet. The  
18 evolution of thin melanin layers unlocks color-producing possibilities, more than doubling  
19 the range of colors that can be produced with a thick melanin layer and simultaneously  
20 increasing brightness. We discuss the implications of these findings for the evolution of  
21 iridescent structures in birds and propose two evolutionary paths to brilliant iridescence.

22

## 23 **Introduction**

24 Many animal colors—and indeed some plant, algae and possibly fungus colors  
25 (Brodie et al., 2021)—are structural, produced by the interaction of light with micro- and

26 nano-scale structures (reviewed in Kinoshita et al., 2008). In birds, structural colors greatly  
27 expand—relative to pigment-based mechanisms—the range of colors birds can produce with  
28 their feathers (Stoddard and Prum, 2008). Some structural colors are iridescent: the perceived  
29 hue changes with viewing or lighting angle. Iridescent coloration features prominently in the  
30 dynamic courtship displays of many bird species, including birds-of-paradise (Paradisaeidae),  
31 hummingbirds (Trochilidae) and pheasants (Phasianidae) (Greenewalt et al., 1960; Stavenga  
32 et al., 2015; Zi et al., 2003). These dazzling displays showcase the kind of bright and  
33 saturated iridescent colors that have previously been qualitatively categorized as "luxurious"  
34 (Auber, 1957) or "brilliant" (Durrer, 1977), in contrast to the more muted "faint" (Auber,  
35 1957) or "weak" (Durrer, 1977) iridescent colors of, for example, a brown-headed cowbird.  
36 Following these authors, we use the terms "weak" and "brilliant" to describe this difference in  
37 color appearance, where brilliant iridescence describes colors of high saturation and  
38 brightness, and weak iridescence colors of low saturation and brightness. Typically, brilliant  
39 iridescence is associated with more complex feather nanostructures than weak iridescence.  
40 All iridescent feather coloration is produced by nanostructures in the feather barbules  
41 consisting of melanin-filled organelles (melanosomes) and keratin (Figure 1), but brilliant  
42 iridescent coloration arises from light interference by photonic crystal-like structures  
43 (henceforth photonic crystals), while weak iridescent coloration is produced by structures  
44 with a single layer of melanosomes (Durrer, 1977). A photonic crystal is defined by having  
45 periodic changes in refractive index (Joannopoulos et al., 2008); in feather barbules, this is  
46 created by periodic arrangements of melanosomes in keratin. By adding more reflection  
47 interfaces, a photonic crystal greatly amplifies color saturation and brightness compared to a  
48 single-layered structure, the latter which functions as a simple thin-film (Kinoshita et al.,  
49 2008).

50           In iridescent feathers, it is not just the arrangement of melanosomes that can vary: the  
51 melanosomes also come in a variety of different shapes. Durrer, 1977 classified melanosomes  
52 into five main types: 1) thick solid rods (S-type, Figure 2A); 2) thin solid rods (St-type,  
53 Figure 2B); 3) hollow rods (with an air-filled interior, R-type, Figure 2C); 4) platelets (P-  
54 type, Figure 2D); and 5) hollow platelets (K-type, Figure 2E). Thick solid rods are typically  
55 found in single-layered structures producing weak iridescence (Figure 2A), while thin solid  
56 rods, hollow rods, platelets and hollow platelets occur in photonic crystals producing brilliant  
57 iridescence (Fig 2B-D). This diversity is extraordinary given that the shape of melanosomes  
58 in other melanized vertebrate tissues, including black and grey feathers, is typically a solid  
59 rod (D’Alba and Shawkey, 2019). The thick solid rods found in weakly iridescent feathers  
60 resemble the melanosomes found in plain black feathers (Durrer, 1977) and are likely  
61 ancestral to the four more elaborate, derived melanosome shapes (Shawkey et al. 2006; Maia  
62 et al. 2012). Because the derived melanosome shapes (but not the ancestral thick solid rods)  
63 are arranged as photonic crystals, these two innovations together—novel shapes and photonic  
64 crystal structure—may have been critical for the evolution of brilliant iridescence. Supporting  
65 this idea, Maia et al., 2013b showed that the evolution of hollow and/or platelet-shaped  
66 melanosomes in African starlings (Sturnidae) was associated with great expansions in color  
67 diversity and increases in brilliance. Moreover, Eliason et al., 2013 used optical modeling and  
68 plumage color measurements of the violet-backed starling (*Cinnyricinclus leucogaster*) and  
69 wild turkey (*Meleagris gallopavo*) to show that hollow rods increase the brightness of  
70 iridescent colors compared to structures with solid rods.

71           While previous studies focusing on nanostructural evolution and color-producing  
72 mechanisms in a variety of avian subclades (Eliason et al., 2020, 2015, 2013; Eliason and  
73 Shawkey, 2012; Gammie, 2013; Gruson et al., 2019; Maia et al., 2013b; Quintero and  
74 Espinosa de los Monteros, 2011) have given us valuable insights into the evolution and optics

75 of iridescent structures, they have focused on specific species, subclades or a particular  
76 melanosome type in isolation. Thus, they have not uncovered the broader, general principles  
77 governing the evolution of brilliant iridescent plumage, and several key questions remain  
78 unanswered.

79         Why have bird species with brilliant iridescence evolved not one but four different  
80 melanosome types? How are these melanosome types phylogenetically distributed? Are  
81 particular melanosome types associated with different plumage colors? Since Durrer's  
82 publication in 1977, there has been no broad-scale evolutionary analysis of the melanosomes  
83 in iridescent feathers, and no study has compared the optical effects of all five of Durrer's  
84 melanosome types. To find general principles underlying differences in color production, we  
85 identify key modifications of each melanosome type that based on optical theory are likely to  
86 be important. This enables us to compare the five melanosome types rigorously, since each  
87 type can have several modifications. For example, a hollow platelet (Figure 2E) has both an  
88 air-filled interior and a flattened shape, both of which might influence feather color—perhaps  
89 in different ways. Therefore, a simple comparison of the melanosome types cannot reveal  
90 which modifications are contributing to differences in color production and how.

91         In this study, we search for general design principles underlying the production of  
92 brilliant iridescent coloration. First, we identify three key modifications of melanosomes in  
93 brilliant iridescent structures: thin melanin layers, hollowness, and platelet shape, (Figure 2).  
94 Second, we create a feather iridescence database using published descriptions of iridescent  
95 feather structures. Using the database, we explore the evolutionary history of the three key  
96 modifications of brilliant iridescent structures. Third, we use optical modeling to simulate  
97 colors that could be produced with each melanosome type; we estimate light reflectance from  
98 4500 different structures using parameter ranges derived from the database. Finally, we

99 analyze spectral data from 120 plumage regions across 80 diverse bird species with known  
100 nanostructures to test the predictions of our optical model.

101

## 102 **Results**

### 103 **1) Identifying key melanosome modifications**

104 The size, composition and shape of materials that form the periodic layers in a  
105 photonic crystal can all contribute to its reflectance properties (Joannopoulos et al., 2008). In  
106 iridescent structural feather colors, the layers are formed by melanosomes, and we can  
107 identify three melanosome modifications that likely have important optical effects. We define  
108 these modifications relative to the thick solid rods found in weakly iridescent feathers, since  
109 we presume these to be “unmodified” or “minimally modified” from melanosomes found in  
110 other non-iridescent melanized tissues, which they closely resemble. The three modifications  
111 are: thin melanin layers (size of layers), an air-filled interior (layer material composition), and  
112 platelet shape (shape of layers). “Thin” here refers to something thinner than the ancestral  
113 thick solid rods. A “melanin layer” refers to a single layer in the optical structure. For solid  
114 rods and platelets, this is simply the rod or platelet diameter, but for hollow rods and  
115 platelets, this is thickness of a single melanin wall (Figure 2F). Each of Durrer's five  
116 melanosome types can be described in terms of the absence/presence of one or several  
117 modifications (Figure 2).

118 What are the potential optical advantages of melanosomes with these features? First  
119 let us consider thin melanin layers. Thin melanin layers may tune the structure so that it  
120 reflects optimally in the bird-visible spectrum. This possibility was raised by Durrer, 1977,  
121 who noted a convergence towards thin [melanin] layers in structures producing brilliant  
122 iridescent colors. However, his work is only available in German, and this idea has remained  
123 largely overlooked. We refine and extend his idea here using established optical theory,

124 specifically multilayer optics (reviewed in Kinoshita 2008; Kinoshita et al. 2008). To produce  
125 first order interference peaks, which will result in brighter colors than higher order  
126 interference peaks, the optical thickness (thickness×refractive index) of each repeating unit in  
127 a one-dimensional photonic crystal (also often termed multilayer, Figure 2B, D-E) should  
128 approximate half a wavelength ( $\frac{\lambda}{2}$ ) (cf. Durrer, 1977; Kinoshita et al., 2008; Land, 1972). The  
129 repeating unit in an iridescent feather nanostructure consists of one layer of melanosomes and  
130 one layer of keratin, and we can therefore express this as  $(t_{mel} \times r_{mel}) + (t_k \times r_k) = \frac{\lambda}{2}$ ,  
131 where  $t$  is the thickness and  $r$  is the refractive index of melanin ( $mel$ ) and keratin ( $k$ ) layers.  
132 Among the configurations that satisfy this condition, maximum reflection is achieved when  
133 both layers have equal optical thickness, which can be expressed as  $(t_{mel} \times r_{mel}) =$   
134  $(t_k \times r_k) = \frac{\lambda}{4}$  (Kinoshita et al., 2008; Land, 1972). From this, we can calculate the range  
135 within which we would expect melanin optical layer thickness to fall:  $(t_{mel} \times r_{mel}) \leq \frac{\lambda}{2}$ ,  
136 with maximum reflectance at  $(t_{mel} \times r_{mel}) = \frac{\lambda}{4}$ . In practice, this means we should expect to  
137 see melanin layer thicknesses of at most 75nm (respectively 206nm) with maximum  
138 reflectance at 38nm (respectively 103nm) for the ends of the bird-visible spectrum; 300nm  
139 (respectively 700nm). Here, we use the refractive indices  $r_{mel} = 2$  for 300nm and  $r_{mel} = 1.7$   
140 for 700nm, obtained by Stavenga et al., 2015. The typical diameter of melanosomes found  
141 vertebrates is much larger than this range, ~300nm (Li et al., 2014).

142 Now let us consider why melanosomes with hollow interiors and/or platelet shapes  
143 might be advantageous. A hollow interior could increase reflection by creating a sharper  
144 contrast in refractive index in the structure (Durrer, 1977; Eliason et al., 2013; Kinoshita,  
145 2008; Land, 1972; Stavenga et al., 2018), while platelet-shaped melanosomes could increase  
146 reflection by creating smooth, mirror-like reflection surfaces (Durrer, 1977; Land, 1972).

147 Moreover, the thin platelet shape might allow for more layers to be packed within a photonic  
148 crystal, which would increase total reflection (Maia et al., 2013b).

149 Which of the four derived melanosome types in brilliant iridescent feathers possess  
150 these modifications? Hollowness and platelet shape are each present in two types, but thin  
151 melanin layers are likely shared by all four derived melanosome types. This was indicated by  
152 Durrer, 1977, but he never analyzed the distribution of layer thickness among the structures  
153 he measured. However, this potential convergence hints at the intriguing possibility that all  
154 four derived types present diverse paths to the same end: achieving optimal melanin layer  
155 thickness. A hollow interior or a platelet shape may simply be different mechanisms for  
156 reducing melanin layer thickness. This would also explain why thick solid rods are typically  
157 only found in single-layered structures. Single-layered structures typically function as thin-  
158 films, where only the overlying keratin cortex produces the interference colors (Doucet,  
159 2006; Lee et al., 2012; Maia et al., 2009; Yin et al., 2006). The layer of melanosomes only  
160 functions to delimit the keratin layer, therefore the thickness of the melanin layer itself is  
161 irrelevant. Thus, there would be no selection pressure to decrease melanin layer thickness in  
162 single-layered structures, and we would expect the ancestral condition (thick solid rods) to  
163 remain.

164 We suggest that the diverse melanosome types found in brilliant iridescent structures  
165 evolved to generate thin melanin layers in different ways. This possibility has not been  
166 investigated previously, probably because melanosome types are generally analyzed on the  
167 basis of their overall morphology rather than—as we have proposed here—on the basis of  
168 specific optical modifications.

169

170 **2) Evolution of modified melanosomes in iridescent structures**

171 We surveyed the literature for all published descriptions of iridescent feather  
172 structures in order to build a species-level database (henceforth the feather iridescence  
173 database) of key structural parameters (Figure 8). These parameters included melanosome  
174 type (solid rod, hollow rod, solid platelet, hollow platelet), melanin layer thickness, details  
175 about the structure (single-layered or photonic crystal), and size of the internal air pockets.  
176 We found that iridescent feather nanostructures have been described in 306 bird species  
177 representing 15 different orders and 35 families. The feather iridescence database, which  
178 includes a complete list of the references we consulted, is included in the Supplementary  
179 Information.

180 Descriptions of iridescent feather structures are taxonomically biased, with some  
181 groups well represented (>20 species represented in the database: Sturnidae, Trochilidae,  
182 Phasianidae, Trogonidae and Anatidae) but most groups sparsely sampled (<5 species in the  
183 database) or absent (e.g., Picidae). Even in well-sampled groups (e.g., Trochilidae), the  
184 feather structures of only about 15% of all the species in the family have been described.  
185 Some published descriptions included measurements of every structural parameter, while  
186 others only included partial information on melanosome modifications. For 61% of the  
187 species has the thickness of melanin layers been described, while almost all species have  
188 complete information on the presence/absence of melanosome hollowness and/or platelet  
189 shape (92%). Most species records (83%) described the type of structure (single-layered or  
190 photonic crystal). These data, though taxonomically biased, allowed us to describe the  
191 properties of the three melanosome modifications we defined (thin melanin layers,  
192 hollowness, platelet shape). Using an avian phylogeny (Jetz et al., 2012), we mapped these  
193 modifications for all 280 species for which complete information on melanosome type was  
194 present in our database (Figure 3A). Although these species represent only a fraction of those  
195 with iridescent feathers, the major iridescent orders are represented. Our analysis thus



196 provides a broad snapshot of iridescent feather structure diversity and evolution across birds.  
197 In the sections below, we use this dataset to test functional hypotheses for each modification  
198 and discuss their evolutionary pattern in more detail.

199

#### 200 *Thin melanin layers*

201 We have suggested that all four melanosome types found in brilliant iridescent  
202 structures (Figure 2B-E) share a common trait: a reduction in melanin layer thickness. This is  
203 plausible based on the measurements and description of melanosome types given by Durrer,  
204 1977 but has not been formally quantified. In fact, Durrer's division of solid rods into a  
205 thinner (diameter of ~100nm) and thicker variety (diameter of ~200nm) has not been  
206 previously tested or precisely defined. In the current literature, solid rods are often treated as  
207 a single type with a continuum of diameters (Eliason et al., 2013; Maia et al., 2013b; Nordén  
208 et al., 2019). Thus, to study the evolution of thin melanin layers, we first needed to define this  
209 trait using the feather iridescence database. Specifically, we used the feather iridescence  
210 database to show that: 1) Solid rods can be divided into two distinct distributions (a thinner  
211 and thicker variety), 2) Hollow and/or platelet shaped melanosomes have equally or thinner  
212 melanin layers than thin solid rods, demonstrating that they share this modification.

213 Exploring the distribution of melanosome diameter in all solid rods, we found a  
214 significant bimodal distribution (Figure 4, unimodality rejected,  $p < 0.001$ , bimodality not  
215 rejected,  $p = 0.86$ ). Based on the bimodal distribution of melanosome diameters in solid rods,  
216 we define “thick solid rods” as those with a diameter  $> 190\text{nm}$  and “thin solid rods” as those  
217 with a diameter  $\leq 190\text{nm}$ . It should be noted that this definition differs slightly from Durrer's  
218 categorization, who notes a range of 70-140nm for the thin solid rods he measured (Durrer,  
219 1977). It can be seen that thick solid rods overlap considerably with melanosomes in black  
220 feather (data from Li et al., 2012), supporting the hypothesis that thick solid rods represent

221 minimally or unmodified melanosomes. Iridescent structures most likely evolved from black  
222 plumage (Maia et al., 2012; Shawkey et al., 2006), therefore we can use the size of  
223 melanosomes in black melanosomes to represent an "unmodified" melanosome. In contrast,  
224 there is no overlap between the melanin thickness of melanosomes in black feathers and thin  
225 solid rods, suggesting that this is a considerable modification from the ancestral state.

226 We can now define "thin melanin layers" as any melanosome with melanin layers  
227  $\leq 190\text{nm}$ . Using this new definition, we found that all hollow and/or platelet-shaped  
228 melanosomes can indeed be classified as having thin melanin layers (range 24-139nm, Figure  
229 5). Whether a single melanin wall in hollow melanosomes always represent one melanin  
230 layer is debatable: some photonic crystals with hollow melanosomes have little or no keratin  
231 interspersed between melanosome layers (e.g., Figure 2C, E). In these cases, it may be more  
232 appropriate to think of a single melanin layer as the sum of two melanin walls. However, all  
233 hollow forms in photonic crystals have a melanin wall thickness of  $<100\text{nm}$  (Figure 5), so  
234 they would still qualify as "thin". All four derived melanosomes with thin melanin layers  
235 have significantly thinner melanin layers than melanosomes in black feathers and thick solid  
236 rods (phylogenetic pairwise t-test, all  $p < 0.01$ , see details in Table S1).

237 Next, we tested our hypothesis that thin melanin layers evolved for a specific optical  
238 benefit—to allow photonic crystals to produce bright and saturated colors. We have already  
239 shown that the four derived melanosomes share a modification for thin melanin layers, but it  
240 is possible that this evolved for reasons unrelated to color production, such as to minimize the  
241 cost of melanin production. We predicted that if thin melanin layers did evolve for the optical  
242 benefit, they should have converged on the optimal range for producing bright interference  
243 peaks in the bird-visible spectrum (38-206nm). In addition, we predicted that melanosomes  
244 with a thickness outside this favorable range should be rare or absent in photonic crystals. We  
245 found that all melanosomes with a decreased melanin layer thickness indeed have converged

246 on thicknesses well within this optimal range (Figure 5). Moreover, all derived melanosome  
247 types achieve thicknesses of  $\frac{\lambda}{4}$  (38-103nm). Such structures could in theory produce ideal  
248 multilayers, which produces the greatest reflectance for a two-material reflector (Land,  
249 1972). We also found that the great majority of photonic crystals contain melanosomes with  
250 thin melanin layers (98%). Overall, these findings are compatible with the hypothesis that the  
251 primary benefit of thin melanin layers is to produce bright and saturated colors.

252         The importance of this modification for iridescent color production can also be  
253 inferred from its phylogenetic distribution. Over 80% of all families represented in the  
254 feather iridescence database have evolved thin melanin layers (27 out of 32 families, Figure  
255 3B). The families that lack the thin modification also lack species with brilliant iridescent  
256 plumage (Numididae, Aegithinidae, Irenidae, Buphagidae, Megapodiidae and Lybiidae).

257

### 258 *Hollowness*

259         Hollowness occurs in both rod-shaped and platelet-shaped melanosomes. However,  
260 whether the size of internal air pockets differs in rods compared to platelets has never been  
261 tested. If air pockets function primarily in producing strong interference colors in bird-visible  
262 wavelengths, we predict that there should be no difference between air pocket diameter in  
263 rods and platelets and that diameters should be constrained between 75-175nm ( $n_{\text{air}} = 1$ ) to  
264 give similar optical thicknesses as melanin layers ( $\frac{\lambda}{2}$ ), thereby optimizing reflection (see  
265 Results, §1). On the other hand, if hollowness evolved for different reasons in rods and  
266 platelets, and/or for non-optical functions, they may differ. Air pocket size (length in the  
267 shortest dimension, see Figure 8) ranged from 50-251 nm and did not differ significantly  
268 between rods and platelets (phylogenetic ANOVA,  $F(1, 55) = 16.8$ ,  $p=0.176$ ,  $df=3$ ). This  
269 range does indeed include the thickness that would produce interference colors of the first  
270 order in the bird-visible range. Together with our results on melanin layer thickness, this

271 indicates both air pockets in hollow melanosomes and thin melanin layers are simultaneously  
272 tuned to produce bright and saturated colors.

273         Our phylogenetic analysis shows that a hollow interior has evolved in at least 12 bird  
274 families, or 34% of all families in the feather iridescence database (Figure 3B). Many  
275 families with brilliant iridescence are included, such as Phasianidae, Trochilidae and  
276 Sturnidae. However, hollow melanosomes do not appear to be a requirement for brilliant  
277 iridescence. Unlike thin melanin layers, which are present in all families exhibiting brilliant  
278 iridescence, hollow melanosomes are absent in many families containing brilliant iridescent  
279 species, such as Nectariniidae, Paradisidae and Columbidae. Still, the occurrence of a hollow  
280 modification is phylogenetically widespread. The 12 families with a hollow modification  
281 belong to 10 different orders (Galliformes, Coraciiformes, Passeriformes, Bucerotiformes,  
282 Trogoniformes, Cuculiformes, Pelecaniformes, Caprimulgiformes, Piciformes and  
283 Ciconiiformes), which suggests that the genetic changes associated with producing a hollow  
284 melanosome are either likely to occur or highly conserved in birds. A more comprehensive  
285 phylogenetic analysis will be required to determine how many times hollow melanosomes  
286 have evolved independently in birds, but our study gives a likely minimal estimate of 10  
287 independent origins of this modification.

288

### 289 *Platelet shape*

290         We classified structures as "platelet-shaped" if they diverged from a circular cross-  
291 section. The degree of divergence varies, resulting in platelets with a range of eccentricities.  
292 Unfortunately, with few exceptions, the studies surveyed did not include measurements of the  
293 width of platelets, preventing us from quantifying and exploring the 3D shape of platelets  
294 (e.g., eccentricity). We did not find support for the hypothesis that platelets allow birds to  
295 incorporate a greater number of layers in the iridescent structure—there was no significant

296 difference between number of layers in structures with platelets compared to rods  
297 (phylogenetic ANOVA,  $F(1, 220) = 21.88$ ,  $p = 0.321$ ).

298 Platelets are present in 11 bird families, or 31% of all families represented in the  
299 feather iridescence database (Figure 3B). This is a very similar to the frequency of the hollow  
300 modification. In fact, many of the families that have evolved a hollow modification have also  
301 evolved platelets. In some cases the modifications have evolved in combination, producing  
302 hollow platelets—but in other cases solid platelets and hollow rods have evolved separately  
303 within a family. Only Nectariniidae, Hirundinidae, Hemiprocnidae, Apodidae and Psophiidae  
304 have evolved platelet shapes but never hollow forms (with the caveat that this may change  
305 with increased sampling). As with hollowness, platelets are present in many but not all  
306 families with brilliant iridescence. For example, platelets are absent in Paradisidae,  
307 Phasianidae and Columbidae. Nevertheless, platelets are widely distributed across birds; they  
308 are present in 7 different orders (Passeriformes, Pelecaniformes, Caprimulgiformes,  
309 Trogoniformes, Gruiformes, Piciformes, Cuculiformes).

310

### 311 *Evolution of multiple modifications*

312 We hypothesized that hollow and platelet modifications are in fact different  
313 mechanisms for achieving thin melanin layers. This is supported by the fact that hollowness  
314 and platelet-shaped melanosomes always have thin melanin layers – there are no platelets or  
315 hollow forms with melanin layers  $\leq 190\text{nm}$ . However, five bird families have evolved all  
316 three modifications: thin melanin layers, hollowness and platelet shape (Trochilidae,  
317 Trogonidae, Sturnidae, Galbulidae and Threskiornithidae, Figure 3B). If hollowness and  
318 platelet shape are alternative ways to achieve thin melanin layers, then why have some birds  
319 evolved both? The repeated evolution of hollow platelets suggests that at least one  
320 modification carries some additional functional value. For example, hollowness may in itself

321 also increase the brightness of colors. Though it is possible that both modifications evolved  
322 together due to a shared mechanistic path, rather than due to some adaptive benefit, this is  
323 unlikely because species in each order with hollow platelets have close relatives with solid  
324 platelets, solid rods and/or hollow rods (Figure 3A). Thus, there does not appear to be a  
325 strong constraint on evolving particular modifications together, since each modification exist  
326 in isolation.

327

### 328 **3) Optical consequences of modified melanosomes**

329 To understand how each melanosome modification affects color production, we  
330 simulated light reflection from different structures using optical modelling. We generated  
331 4500 unique structures which varied systematically in structural parameters (including  
332 diameter of melanosomes, lattice spacing, hollowness and platelet shape; see full model  
333 description in Methods). The parameter ranges used to generate the structures were derived  
334 from the known ranges reported in the feather iridescence database. Thus, although the  
335 simulated structures are hypothetical, they represent a realistic approximation of the  
336 structural variation that could exist, while allowing us to standardize parameters that could  
337 bias comparisons in real structures. For example, we modeled all simulated structures as  
338 photonic crystals with four layers, while real structures include single-layered structures as  
339 well as photonic crystals with varying numbers of layers, which would affect the brightness  
340 and saturation of colors independent of melanosome types.

341 We modeled the simulated reflectance spectra in avian color space to estimate color  
342 saturation and diversity in a manner that is relevant to bird color perception. The avian  
343 tetrahedral color space represents all the colors a bird can theoretically perceive (Endler and  
344 Mielke, 2005; Goldsmith, 1990; Stoddard and Prum, 2008). Reflectance spectra can be  
345 represented in tetrahedral avian color space as a function of how they would stimulate a

346 bird's four color cone types. Once reflectance spectra are mapped in avian color space, we  
347 can extract values of saturation (distance to the achromatic center of the tetrahedron) and  
348 color diversity (mean Euclidean distance between all points, and number of voxels occupied,  
349 see Methods for details). To quantify the brightness of a spectrum, we used two measures: (1)  
350 peak reflection (% reflectance at the wavelength of maximum reflectance); and 2) estimated  
351 stimulation of the avian double cones, which may play a role in achromatic perception (Hart,  
352 2001; Jones and Osorio, 2004). We refer to both metrics as “brightness” for convenience; the  
353 term luminance is often used to describe the perception of signal intensity (here modeled  
354 using the avian double cones). Together, these metrics give a good representation of the  
355 saturation, color diversity and brightness of simulated reflectance spectra, where saturation  
356 and brightness together describe the brilliance.

357       Optical modeling revealed that thick solid rods are severely constrained in color  
358 diversity (Figure 6A). The simulated spectra are clustered towards the center of the  
359 tetrahedron, which means that they are producing colors of low saturation. In known feather  
360 nanostructures, thick solid rods are almost exclusively found in single-layered structures,  
361 which produce colors of low saturation and brightness. In theory, low color saturation and  
362 brightness could be due to the single-layered structure, as opposed to the melanosome type.  
363 However, we modeled all structures with four layers, suggesting that it is the thick solid rods  
364 themselves—and not the number of layers—that limits color production. In other words,  
365 producing saturated colors is not possible with thick solid melanosomes, irrespective of  
366 whether the structure is single-layered or a photonic crystal.

367       In contrast, all four derived melanosome types with thin melanin layers produce a  
368 large range of saturated colors (Figure 6B-E). Color diversity (voxel occupation and color  
369 span) is very similar for the four derived types, suggesting that melanin thickness is the most

370 important modification to achieve saturated and varied colors (Figure 6K-L), which is the  
371 only modification they all share.

372 To explore the effect of thin melanin layers, hollowness and platelet shape on color  
373 properties in detail, we constructed linear models with melanosome modifications as binary  
374 predictors and saturation, brightness, and peak reflectance as responses. This allowed us to  
375 separate effects for each modification, which are combined in many melanosome types (for  
376 example, hollow rods are both hollow and have thin melanin layers). In agreement with the  
377 results for color space occupation, melanin layer thickness explained the greatest amount of  
378 variation in saturation in our linear model (Figure 6M). A positive effect was also seen for a  
379 platelet shape, which suggests that solid platelets produce colors of the highest saturation.  
380 Small losses in saturation are incurred from incorporating hollowness, as can be seen from  
381 the negative coefficients of the variable hollowness and the interaction term  
382 hollowness×platelet shape (describing hollow platelets).

383 The linear model showed that all modifications increase brightness. This effect is  
384 strongest for the interaction of hollowness and platelet shape (Figure 6N). Thus, the optical  
385 model predicts that hollow platelets produce the brightest colors. This effect likely arises  
386 from a lowered refractive index of melanosome layers with hollow platelets, which have a  
387 lower melanin-to-air ratio than layers built with hollow rods. However, this effect may be  
388 considerably weaker in real structures, where hollow platelets often have an internal  
389 honeycomb-like structure of melanin (Figure 2E), which would make the effective refractive  
390 index closer to that of hollow rods. Thin rods, hollow rods and solid platelets produce colors  
391 that are less bright than those of hollow platelets but similarly bright to one another. The  
392 linear model for peak reflection yielded similar results to those obtained for brightness  
393 (Figure 6O). These results indicate that evolving a thin melanin layer thickness is the single  
394 most important factor for dramatically increasing color diversity and saturation while



395 simultaneously increasing brightness. When this effect is accounted for, a platelet-shape has a  
396 similar but weaker effect on saturation and brightness and hollowness only increases  
397 brightness further.

398

#### 399 **4) Testing predictions in real plumage data**

400       Next, we investigated whether we could recover the same patterns in the iridescent  
401 plumage of birds with different nanostructures. We collected spectral data from 80 species  
402 that were represented in the feather iridescence database and possessed known melanosome  
403 types.

404       In agreement with the optical model results, the color diversity of structures with  
405 thick solid rods was low, almost half of that found in structures with thin melanin layers  
406 (Figure 6F). Moreover—mirroring the results in our optical model simulations—thin solid  
407 rods, hollow rods, solid platelets and hollow platelets are all nearly equal in color diversity  
408 (Figure 6K-L). However, some differences are noteworthy. In contrast to other melanosome  
409 types, solid platelets do not produce any saturated red colors. This is unlikely to be due to any  
410 inherent developmental or physical constraint, since our optical model simulations—based on  
411 realistic melanosome properties, including size—indicate that solid platelets can clearly  
412 occupy this area of color space (Figure 6D). Rather, this effect may be a consequence of  
413 phylogenetic bias, as the majority of species with solid platelets in our data set are sunbirds  
414 (family Nectariniidae), a group that uses carotenoid pigments—rather than structural colors—  
415 for red plumage coloration.

416       To further explore how thin melanin layers, hollowness and a platelet shape affect  
417 saturation, brightness and peak reflectance, we fitted generalized linear mixed models using  
418 Bayesian methods that allowed us to account for multiple measurements within a species  
419 (i.e., we obtained two reflectance measurements per plumage patch per species). In contrast

420 to our optical model simulations, melanosomes in the real plumage patches we measured  
421 were arrayed in a variable number of layers. Since having many layers is known to increase  
422 brightness and saturation of colors, we added a parameter to control for this effect. The  
423 binary parameter "PC" (photonic crystal) described whether a structure contained a single  
424 layer of melanosomes (not a photonic crystal), or several repeating layers of melanosomes  
425 (photonic crystal).

426 In this linear model, there were no significant effects of either platelet shape or  
427 hollowness on saturation (Figure 6M). Thus, we did not find support for the optical model  
428 prediction that solid platelets produce more saturated colors. We also did not find a  
429 significant positive effect of thin melanin layers (Figure 6M), in contrast to our findings with  
430 the optical model. However, this is likely due to the fact that—in real plumage—thick solid  
431 rods are exclusively found in single-layered structures. Thus, the model can only compare  
432 color for *single-layered structures* with thick and thin melanin layers. The entire difference in  
433 saturation between structures with thin and thick melanin layers (if it exists) will therefore be  
434 captured by the PC parameter. Thus, these results reveal that melanin thickness in single-  
435 layered structures does not affect saturation. While the plumage data cannot directly tell us  
436 the effect of thin melanin layers in a photonic crystal, we do show that single-layered  
437 structures with thick solid rods (plumage data) are just as constrained in color diversity as the  
438 simulated colors generated by photonic crystals with thick solid rods (optical model) (Figure  
439 6A, F). Thus, the optical model predicts that adding more layers with thick solid rods would  
440 not increase color saturation or diversity. This is very likely the reason that no such structures  
441 exist. In single-layered structures on the other hand, the thickness of melanin layers is  
442 typically irrelevant because interference occurs between light reflected from the top and  
443 bottom of the overlying keratin cortex (Doucet, 2006).

444 In terms of brightness and peak reflectance, the plumage data compare to the optical  
445 model simulations in interesting ways. In agreement with the optical model, the linear model  
446 revealed a significant positive effect of hollowness and platelet shape on the brightness and  
447 peak reflectance of colors (Figure 6N-O). However, we did not see a large positive effect of  
448 hollow platelets in the empirical data. In fact, this parameter has a negative effect, which is  
449 significant for peak reflectance (Figure 6O). This discrepancy may be due to the fact that—in  
450 the real plumage structures measured—hollow platelets tended to be arranged in relatively  
451 few layers. Our sample of structures with solid platelets consisted almost entirely of different  
452 species of sunbirds (Family Nectariniidae), which exhibit 5-8 layers (Durrer, 1962), while the  
453 sample for hollow platelets contained several groups with fewer layers (e.g., *Priotelus* and  
454 *Apaloderma*, (Durrer, 1977)). We could not control for this because the number of layers is  
455 not known in many of the structures we sampled; instead, we only included a parameter to  
456 indicate if a structure was a photonic crystal or not. We can, however, compare the brightness  
457 of *single-layered* structures with hollow platelets versus solid platelets. This comparison  
458 shows that the hollow platelets produce brighter colors (phylogenetic ANOVA,  
459  $F(1,34)=12.10$ ,  $p=0.034$ ,  $df=1$ ). Thus, the general conclusion that hollowness increases  
460 brightness is well supported, although this advantage is likely to diminish with increasing  
461 number of layers in the structure. Reflection from a multilayer with melanin and keratin  
462 becomes saturated at  $>9$  layers (Land, 1972), thus it is likely that the greatest advantage of  
463 hollowness is gained for structures with nine layers or less.

464 In summary, the plumage data support the general conclusions that thin melanin  
465 layers are critically important for producing diverse and brilliant colors, while hollowness  
466 and platelet shape are less crucial. We observe a near doubling of color diversity for real  
467 plumage structures with thin melanin layers compared to structures with thick solid rods,  
468 consistent with results of the optical model. While the plumage data alone cannot prove that

469 this difference is driven by thin melanin layers rather than simply the PC parameter by itself,  
470 our optical models exclude this possibility (see Figure 6A for a simulation of photonic  
471 crystals with thick solid rods). Hollowness and a platelet shape increase the brightness of  
472 colors further, in agreement with the optical model.

473

## 474 **Discussion**

475 Brilliant iridescence has been linked to the evolution of different melanosome  
476 modifications, most notably hollowness and a platelet shape (Eliason et al., 2013; Maia et al.,  
477 2013b), but how these modifications affect color production has not been evaluated in a  
478 unified framework. Here, we have taken a broad approach comparing all five melanosome  
479 types found in iridescent feathers to uncover general design principles governing the  
480 production of brilliant iridescence. We find that the most important modification to increase  
481 brilliance is not hollowness or a platelet shape *per se*, but rather a third modification that  
482 unites all melanosomes found in brilliant iridescent structures: thin melanin layers.  
483 Specifically, we show that melanosomes in brilliant structures have converged on a melanin  
484 layer thickness of approximately 40-200nm (Figure 5), which is the theoretical optimal  
485 thickness to produce first-order interference peaks in the bird-visible spectrum. Our optical  
486 simulations and empirical data demonstrate that this modification alone nearly doubles color  
487 diversity (Figure 6A-L) and simultaneously increases saturation and brightness (Figure 6M-  
488 O). In contrast, hollowness and platelet shape on their own only contribute to increased  
489 brightness.

490 Our results have interesting implications for the evolution of brilliant iridescent  
491 structures in birds. We show that two key optical innovations are required: a photonic crystal  
492 (multiple periodic layers of melanosomes) and  $\frac{\lambda}{2}$  thick melanin layers. Indeed, Durrer, 1977  
493 observed that these two features were common to the brilliant structures he studied, and here

494 we validate the importance of his observation with color measurements and optical  
495 modelling. Since photonic crystals with all four melanosome types found in brilliant  
496 iridescent structures have similar optical qualities, this suggest that variability in melanosome  
497 type may be strongly influenced by historical factors, as opposed to particular types being  
498 associated with specific optical functions. Thus, the reason that sunbirds (Nectariniidae)  
499 produce brilliant iridescence with solid platelets while hummingbirds (Trochilidae) mainly  
500 use hollow platelets (Figure 3A) is likely related to variation in evolutionary history rather  
501 than to variation in selection for different optical properties. Supporting this interpretation is  
502 the fact that diverse photonic crystals in birds often have independent evolutionary origins. In  
503 Galliformes, some families have photonic crystals with thin rods, and others have photonic  
504 crystals with hollow rods (Figure 3A), but these different structures have almost certainly  
505 evolved from an ancestor with a non-iridescent or single-layered structure rather than a  
506 photonic crystal (Gammie, 2013). Similarly in Sturnidae, photonic crystals with hollow rods  
507 in *Cinnyricinclus* and photonic crystals with hollow platelets in *Lamprotornis* likely evolved  
508 independently from non-iridescent structures (Figure 3A, Durrer, 1970; Maia et al., 2013b).

509         Yet, in some groups, melanosome type is highly variable within the same genus, or  
510 even within the same species (interpatch variability). In the birds-of-paradise (Paradisaeidae),  
511 who typically display photonic crystals with thin rods, two species (*Paradisaea rubra* and  
512 *Parotia lawesii*) are known to have evolved large rods with a porous interior (Durrer, 1977;  
513 Stavenga et al., 2015). In *Parotia lawesii*, other iridescent patches contain structures with thin  
514 solid rods, proving interpatch variability in melanosome type. Hummingbirds, whose  
515 iridescent structures are typically built with hollow platelets, can also exhibit interpatch  
516 variability in melanosome type. Some patches may contain a structure with solid platelets, or  
517 even mixed structures with both hollow and solid platelets (Gruson et al., 2019). It is notable  
518 that the only known examples of interpatch variability in melanosome type comes from the

519 birds-of-paradise and hummingbirds—groups that are known to have exceptionally high rates  
520 of color evolution (Eliason et al., 2013; Ligon et al., 2018; Parra, 2010). One hypothesis to  
521 explain this variation could be that modifications in hollowness/platelet-shape tune the  
522 brightness of some patches (Figure 6N-O). However, this seems unlikely. Both birds-of-  
523 paradise and hummingbirds typically have >9 melanosome layers in their iridescent  
524 structures, which already achieves nearly 100% reflectance irrespective of melanosome type.  
525 Moreover, our results suggest that there would be little or no difference in brightness between  
526 structures with solid platelets and hollow platelets (only between thin rods and hollow and/or  
527 platelet-shaped melanosomes), which is the variability we see in hummingbirds. Indeed,  
528 Gruson et al., 2019 found color production to be similar among patches with different  
529 melanosome types in hummingbirds. We speculate that high variability in melanosome type  
530 in hummingbirds and birds-of-paradise is not related to general optical benefits of specific  
531 melanosome types or modifications, but rather to general high rates of color change in these  
532 groups (Eliason et al., 2020; Parra, 2010). Our optical modeling results (Figure 6B-E) show  
533 that there are multiple ways to reach the same areas of color space—using different  
534 melanosome types. It is possible that a change in melanosome type may be the fastest route to  
535 a new area of color space, even though the same color shift could in theory be produced with  
536 adjusting the size of the original melanosome type. This idea is hard to test with our current  
537 very limited understanding of the genetics of iridescent structures, but it does predict that  
538 groups with high variation in melanosome type have a greater standing variation in genetic  
539 traits associated with different melanosome types. It also predicts that patches with higher  
540 rates of color evolution should also have greater variability in melanosome type.

541         However, we cannot fully exclude hypotheses based on general adaptive explanations  
542 tied to melanosome type to explain interpatch variability in melanosome type. We did not  
543 investigate differences in angular variation of color for different types of structures, or

544 potential non-signaling functions such as differences in mechanical properties of the barbule  
545 (Burt Jr., 1979) and microbial resistance (Goldstein et al., 2004). These topics are promising  
546 avenues of future research. Nevertheless, it is clear that we need to understand how brilliant  
547 structures evolve to resolve fully the mystery of their structural diversity. To our knowledge,  
548 no general models have been proposed to explain how photonic crystals with modified  
549 melanosomes evolve from more simple, single-layered structures (but see discussion by  
550 Durrer, 1977, 1970). We can use the insights derived from our study to propose two  
551 hypothetical routes to brilliant iridescence.

552         Brilliant iridescent structures likely originate from single-layered structures with thick  
553 solid rods (Maia et al., 2012; Shawkey et al., 2006). To achieve brilliant iridescent colors,  
554 such a structure must evolve to incorporate a photonic crystal-like organization of  
555 melanosomes—and the melanosomes must have thin melanin layers. However, our results  
556 showed that either of these changes on their own does not increase color saturation or  
557 brightness. This leads to an interesting problem, where only the two adaptations *together*  
558 produce a great advantage in brilliance. How could such a structure evolve? We suggest two  
559 plausible evolutionary routes by which this conundrum can be solved (Figure 7).

560         In the first route, modified melanosomes with thin melanin layers evolve for reasons  
561 unrelated to color saturation (Figure 7B), perhaps to enhance brightness. Hollow and platelet-  
562 shaped modifications may evolve initially to produce brighter colors, while thin solid rods  
563 have been hypothesized to facilitate formation of thin-film structures through their elongate  
564 shape (Maia et al., 2012). Once evolved, melanosomes with thin melanin layers allow for the  
565 evolution of photonic crystals, since such structures would produce brighter and more  
566 saturated colors. The second route to brilliant iridescence involves the spontaneous formation  
567 of a photonic crystal from a single-layered structure, which then selects for modified  
568 melanosomes with thin melanin layers (Figure 7C). In many single-layered structures, a

569 discontinuous second layer can be seen beneath the top layer, where melanosomes are packed  
570 hexagonally (e.g., Figure 2A). This likely provides a more mechanically stable configuration  
571 during barbule development (as suggested by Eliason et al., 2013). It is easy to see how the  
572 evolution of hollowness in such a structure would lead to the production of brilliant  
573 iridescence.

574         The feather iridescence database gives some support to both of these hypothetical  
575 routes. Single-layered structures with modified melanosomes are relatively common (Figure  
576 5), suggesting that this may be a likely first step towards more complex structures. Similarly,  
577 hexagonally arranged photonic crystals with hollow rods are common in many groups  
578 (Galliformes, Trogoniformes), which also contain taxa with single-layered structures with  
579 thick solid rods. However, very few clades are sampled in sufficient detail to draw inferences  
580 about the transitions between different structures. To test our hypotheses, careful  
581 characterization of nanostructures in a group with repeated transitions to brilliant iridescence  
582 is needed. Such a study could also lay the groundwork for exploring the genetic regulation of  
583 iridescent structures, an area of research in its infancy (Saranathan and Finet, 2020).

584         By investigating the evolution and optical properties of brilliant iridescent feather  
585 nanostructures spanning 15 avian orders, we have identified some features common to  
586 iridescent nanostructure design and some features that are likely to result from differences in  
587 evolutionary history. The key feature uniting melanosomes in brilliant iridescent structures is  
588 the presence of thin (40-200nm) melanin layers, which tunes a photonic crystal optimally to  
589 produce bright and saturated colors in the bird-visible spectrum. We suggest that much of the  
590 diversity in melanosome type in brilliant iridescent structures - such as the prevalence of  
591 solid platelets in sunbirds but hollow platelets in hummingbirds - could be explained by  
592 differences in evolutionary history, since different melanosome types offer alternative routes  
593 to producing thin melanin layers. However, the large scale-patterns uncovered in this study



594 are only a first step towards gaining a deeper understanding of how these dazzling structures  
595 have evolved. We propose two likely evolutionary routes, which could be tested further by  
596 careful study of a clade with repeated transitions to brilliant iridescence. A focus of future  
597 studies should be to explore the evolutionary steps associated with the evolution of brilliant  
598 iridescence, and ultimately to tie these steps to genetic changes.

599

## 600 **Materials and methods**

601

### 602 *Building the feather iridescence database*

603 We surveyed the literature for microscopy studies of iridescent feathers using two  
604 complementary approaches. For studies published earlier than 2006, we used the references  
605 in Prum, 2006 and Durrer, 1977 as a starting point. For later publications, we used Google  
606 Scholar to search for articles containing the terms “iridescence” and “feather”. We then  
607 extracted the following information from each study (where available, or possible to infer  
608 from redundant measurements): melanosome arrangement (single-layered, photonic crystal),  
609 melanosome type (i.e., solid rod, hollow rod, solid platelet or hollow platelet), melanosome  
610 diameter ( $d_{\text{mel som}}$ ), lattice spacing ( $a$ ), the number of melanosome layers ( $n$ ), diameter of  
611 hollow interior (if present,  $d_{\text{air}}$ ), thickness of keratin layers ( $k_s$ ), thickness of melanin layers  
612 ( $mt$ ; for solid forms  $mt = d_{\text{mel som}}$ , for hollow forms  $mt = (d_{\text{mel som}} - d_{\text{air}})/2$ ), cortex thickness ( $c$ ),  
613 the patch from which the studied feather originated, and the color of the feather. A schematic  
614 of all measurements is shown in Figure 8. With few exceptions, most studies sampled only a  
615 single iridescent patch from each species. This is based on the assumption that iridescent  
616 nanostructures are similar in all iridescent patches in a species, which seems to be true in  
617 most species but not all; hummingbirds and birds-of-paradise are the only known exceptions  
618 (Durrer, 1977; Gruson et al., 2019).

619 For a small number of records (n=17), we produced new measurements of iridescent  
620 structures using transmission electron microscope images previously collected by Nordén et  
621 al., 2019. Images were measured using the program ImageJ (Abràmoff et al., 2004). All  
622 images used for new measurements are included in the Supplementary Information.

623 In total, our database covers 46 studies from 1952-2019 and 306 unique species,  
624 across 35 families and 15 orders (37% of total orders and 20% of total families in Aves).

625

### 626 *Phylogeny*

627 We used the phylogenies of Jetz et al., 2012, which are based on a Hackett et al., 2008  
628 backbone, to construct a tree including all the species in the feather iridescence database and  
629 the species from the Li et al., 2012 dataset. We sampled 1000 pruned trees from the tree  
630 distribution available at birdtree.org and then constructed a 50% consensus tree from this  
631 distribution. Branch lengths were calculated using the “consensus.edge” function in the R  
632 package *phytools* (Revell, 2012). This tree was then pruned as necessary for different  
633 analyses.

634

### 635 *Optical modeling*

636 We modeled the reflectance from iridescent feather structures using the software  
637 package MIT Electromagnetic Equation Propagation (MEEP) (Oskooi et al., 2010).  
638 Simulations were performed in one unit cell, with an absorbing perfectly matched layer in the  
639 x-direction, and periodic boundaries in the y-direction. Resolution was set to 80 pixels/um,  
640 which gives 12 sampling points for one 300nm wave in the material with the highest  
641 refraction index (melanin). We set the extinction coefficient (k) of melanin to 0.1, the  
642 refractive index (n) of keratin to 1.56, and the refractive index of melanin to 2. In reality n  
643 and k for most materials vary over the spectrum, and these values are an approximation based

644 on published values (Brink and van der Berg, 2004; Stavenga et al., 2015). However, we do  
645 not expect small differences in these parameters to alter the larger patterns we have described  
646 (though they may alter the exact hue and reflection of a particular structure). The extinction  
647 coefficient for keratin is likely to be low ( $k=0.03$ , Brink and van der Berg, 2004) and was  
648 omitted (set to 0).

649 The structural parameters varied in the model were melanosome diameter ( $d_{\text{melso}}$ ),  
650 relative hollowness ( $d_{\text{air}}/d_{\text{melso}}$ ), flatness ( $l_{\text{melso}}/d_{\text{melso}}$ ), relative lattice spacing ( $r_{\text{melso}}/a$ ),  
651 and cortex thickness ( $c$ , Figure 8). We set the ranges for parameters related to melanosome  
652 shape to match the known ranges for each melanosome type, extracted from the feather  
653 iridescence database. Lattice spacing and cortex thickness were varied in the same way for all  
654 melanosome types (the overall range in the feather iridescence database), and number of  
655 layers was fixed to 4 (the median in the feather iridescence database). For structures with  
656 rods, we modeled structures with a hexagonal packing in addition to the standard laminar  
657 configuration (Figure 8B and A respectively) to represent the diversity present in real  
658 structures. Although a square configuration also exists, we did not model this since it has  
659 only been recorded in a single genus, the peafowls (*Pavo*). Table 1 gives a detailed overview  
660 of the model settings for each melanosome type. Notice that the melanosome diameter of  
661 solid forms is varied in 30 steps, while the diameter of hollow forms is only varied in 10  
662 steps. The thickness of melanin layers is important for determining hue, and hollow forms  
663 have two parameters that adjust this value (diameter and hollowness), while solid forms have  
664 only one (diameter). To avoid a bias towards greater hue variability in hollow forms due to  
665 this effect, we allowed the diameter of solid forms to vary in an equal number of steps as the  
666 combined effect of diameter and hollowness in hollow forms ( $10 \times 3 = 30$ ).

667 In total, we ran 4500 simulations, with 900 simulations for each melanosome type.

668 *Table 1. Model parameter ranges for each melanosome type. The values reported in parentheses are the number of evenly*  
 669 *spaced steps with which the parameter was varied. For each melanosome type, we simulated 900 unique structural*  
 670 *configurations.*

| <b>Melanosome type</b>  | <b>Melanosome diameter (nm)</b> | <b>Hollowness (<math>d_{\text{air}}/d_{\text{melosom}}</math>)</b> | <b>Flatness (<math>l_{\text{mel}}/d_{\text{melosom}}</math>)</b> | <b>Relative lattice spacing (<math>r_{\text{melosom}}/a</math>)</b> | <b>Cortex (nm)</b> | <b>Hexagonal packing</b> |
|-------------------------|---------------------------------|--------------------------------------------------------------------|------------------------------------------------------------------|---------------------------------------------------------------------|--------------------|--------------------------|
| <b>Thick solid rods</b> | 190-300 (30)                    | 0                                                                  | 1                                                                | 0.15-0.5 (5)                                                        | 5-1000<br>(3)      | Yes                      |
| <b>Thin solid rods</b>  | 65-180 (30)                     | 0                                                                  | 1                                                                | 0.15-0.5 (5)                                                        | 5-1000<br>(3)      | Yes                      |
| <b>Hollow rods</b>      | 135-440 (10)                    | 0.26-0.69 (3)                                                      | 1                                                                | 0.15-0.5 (5)                                                        | 5-1000<br>(3)      | Yes                      |
| <b>Solid platelets</b>  | 45-140 (30)                     | 0                                                                  | 2,4                                                              | 0.15-0.5 (5)                                                        | 5-1000<br>(3)      | No                       |
| <b>Hollow platelets</b> | 135-280 (10)                    | 0.26-0.69 (3)                                                      | 2,4                                                              | 0.15-0.5 (5)                                                        | 5-1000<br>(3)      | No                       |

671

## 672 *Plumage measurements and spectral analysis*

673 We collected spectral measurements of 80 bird species (across 13 orders) for which  
 674 nanostructures were already known (see references in the feather iridescence database),  
 675 housed in the American Natural History Museum, New York. Spectral measurements were  
 676 taken directly on the specimen following standard procedures (Andersson and Prager, 2006).  
 677 Briefly, we used a USB4000 spectrophotometer and a PX-2 xenon light source (Ocean  
 678 Optics, Dunedin, FL, USA). We measured color over a range of angles (15°-135 °) using a  
 679 goniometer, keeping the light source fixed at 75° (Figure S1). Two individuals were used for  
 680 each species, and all iridescent patches with different color (as perceived by human vision)  
 681 were measured. In total, 120 unique patches were measured.

682 Spectra were analyzed in R v. 3.6.1 (R Core team, 2019) using the package *pavo*  
683 (Maia et al., 2013a). All spectral data were first smoothed to remove noise, using locally  
684 weighted smoothing (LOESS) and a smoothing parameter of 0.2. We then extracted the  
685 spectra with maximum total brightness (area under the curve) for each patch. The variability  
686 between individuals of each species was assessed using pairwise distances in tetrahedral  
687 color space. If the patch measurements for the two individuals were very different in terms of  
688 color (separated by  $>0.1$  Euclidean distance in color space), we inspected the spectral  
689 measurements to identify possible inaccurate readings. Eight spectra were removed from the  
690 data set after this process, leaving a total of 232 spectra used for analysis.

691

#### 692 *Calculation of color variables used in analysis*

693 To compare color diversity and color properties of different structures, we focused on  
694 five variables: 1) the number of voxels occupied in avian color space, 2) mean color distance  
695 in avian color space, 3) color saturation, 4) stimulation of the avian double-cone (brightness)  
696 and 5) peak reflectance. These variables describe color diversity (1-2), color purity (3),  
697 perceptual brightness (4), and objective brightness (5) respectively. Peak reflectance is  
698 simply the maximum reflectance from each spectrum. Perceptual brightness was modeled as  
699 the photon catch from a chicken double cone (*Gallus gallus*, built-in data in the *pavo*  
700 package; see details above), since current evidence suggests that the double cones mediate  
701 achromatic/brightness perception in birds (Hart, 2001; Jones and Osorio, 2004). Saturation  
702 and color diversity were based on modelling spectra in avian color space (Stoddard and  
703 Prum, 2008). This space represents all the colors a bird can theoretically perceive. Relative  
704 cone stimulation was calculated from photon cone catches using cone sensitivity functions in  
705 *pavo*. Bird species vary in their ultraviolet spectral sensitivity; some species have a VS  
706 (violet-sensitive) cone type that is maximally sensitive in the violet range while others have a

707 UVS (ultraviolet-sensitive) cone type that is maximally sensitive in the ultraviolet range.  
708 Because we modeled plumage colors across many phylogenetic groups, we used the  
709 sensitivity curves in pavo for an “average UVS” ( $\lambda_{\max} = 372\text{nm}$ ) and “average VS” ( $\lambda_{\max} =$   
710  $416\text{nm}$ ) type system. Since results in general were similar for a UVS- and VS-type system,  
711 we only include analyses based on a VS-type visual model (summary statistics for a UVS-  
712 type cone can be found in Table S5-6), which is the ancestral condition in birds (Ödeen and  
713 Håstad, 2003).

714 Saturation in tetrahedral color space is simply the distance from the center of the  
715 tetrahedron ( $r$  vector, as defined by Stoddard and Prum, 2008). For number of voxels  
716 occupied, we followed the approach of Delhey, 2015. The tetrahedral color space is divided  
717 into 3D pixels (voxels), and then the number of voxels that have at least one data point are  
718 counted. The resolution of raster cells was set to 0.1, which gives a total of 236 voxels in  
719 tetrahedral color space. Mean color span is a measure of the spread of samples in color space  
720 and is calculated as the mean of pairwise Euclidean distances between all samples. This  
721 measure is more robust to sample size differences than voxel occupation, which makes it  
722 better suited to compare our plumage data.

723

#### 724 *Statistical analysis*

725 To compare iridescent structures recorded in the feather iridescence database  
726 (thickness of melanin layers, diameter of interior hollowness, number of layers), we applied  
727 simulations-based phylogenetic analyses of variance (ANOVA), as described by Garland et  
728 al., 1993 using the R package *phytools* (Revell, 2012). Since this function assumes Brownian  
729 evolution of traits, we measured phylogenetic signal in the traits tested to confirm that this  
730 assumption was not violated. All traits tested recorded a high and significant lambda (Table  
731 S2). To clarify relationships between groups, we also performed phylogenetic pairwise t-tests

732 where necessary (using the R package *phytools* (Revell, 2012), Table S1). Species which had  
733 more than one entry in the database (for example, from multiple studies or multiple patches)  
734 were averaged before analysis. For comparison, we also include melanosome diameters from  
735 black feathers in some analyses. These data were taken from Li et al., 2012.

736 We performed a test for multimodality to assess whether solid rods show a binary  
737 distribution, following the method described by Fisher and Marron, 2001, which is  
738 implemented in the R package *modetest* (Ameijeiras-Alonso et al., 2018).

739 To explore how melanosome modifications affect color production, we fitted separate  
740 linear models with response variables saturation, brightness, and peak reflectance. Brightness  
741 and peak reflectance were log-transformed before inclusion into the models to achieve  
742 normally distributed residuals. We used binary predictors to describe absence/presence of the  
743 three melanosome modifications: thin melanin layers ( $\leq 190\text{nm}$ ), hollowness and platelet  
744 shape. We also added the interaction term {hollowness $\times$ platelet}, since the optical effect of  
745 hollow platelets is not expected to be simply the addition of hollowness and platelet shape.  
746 This is because hollow platelets lower the refractive index of melanosome layers by having  
747 relatively less melanin in each layer. This property only applies to melanosomes which have  
748 both modifications simultaneously. Note that since we have included an interaction term, the  
749 variables hollow and platelet are only describing a situation where the interaction is zero, *i.e.*  
750 for hollow rods and solid platelets respectively.

751 Spectral data derived from optical simulations were analyzed using multiple linear  
752 regressions with the variables described above (summary of results can be found in Table S7-  
753 S9). For plumage data, we also needed to account for phylogenetic relatedness, as well as  
754 individual variability in patch color (for each species we had measurements from two  
755 individuals). We did this using Bayesian linear mixed models, adding phylogenetic structure  
756 and patch as random factors in the model. The phylogeny used was the same as for earlier

757 analyses but pruned to contain only the 80 species in our plumage measurements. We also  
758 added a fourth predictor: presence/absence of a photonic crystal (PC). This variable accounts  
759 for expected variation in color brightness and saturation that is explained by whether the  
760 structure has a single layer of melanosomes or several (in the optical model simulations, all  
761 structures had four layers). We used the R package *MCMCglmm* (Hadfield, 2010) to run our  
762 Bayesian model with Markov Chain Monte Carlo methods. We ran chains for each model for  
763 50 million generations, with a sampling frequency of 500. The first 50000 generations were  
764 discarded as burnin. We used the default priors for the fixed effects and set an inverse gamma  
765 distribution prior for the variance of residuals and random factors. We checked that the  
766 analysis had reached a stable phase by visually examining trace plots and checked that  
767 autocorrelation values between parameters was low (all  $<0.1$ ). We also formally tested  
768 convergence of the chain using Heidelberg's and Welch's convergence diagnostics (all  
769 variables passed both tests). Summary of results for each model can be found in Table S10-  
770 S12.

771

## 772 **Acknowledgements**

773 We would like to thank the American Museum of Natural History (NYC) for allowing  
774 us to use the bird skin collections for plumage spectral color measurements. In particular, we  
775 thank Paul R. Sweet, collections manager for the ornithological collections, for his help. We  
776 thank Kaspar Delhey for generously sharing R code to reproduce his measure of color  
777 diversity (voxel occupation). Funding in support of this work was provided by Princeton  
778 University (M.C.S.), a Packard Fellowship for Science and Engineering (M.C.S.), the  
779 Grainger Bioinformatics Center (C.M.E.), and the National Science Foundation (Award  
780 2029538 to M.C.S.). We would also like to thank Raphael Steiner, Jarome Ali and Merlijn  
781 Staps for helpful discussion and providing feedback on an earlier version of this manuscript.



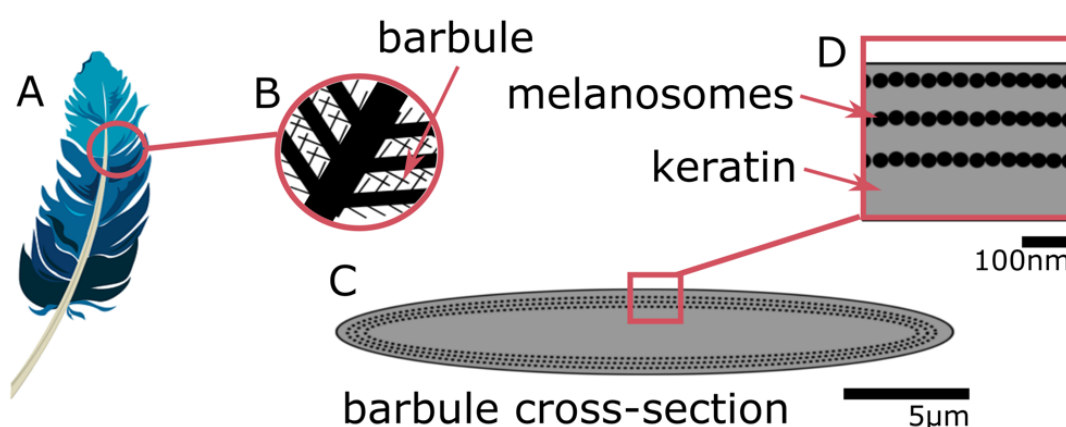

782

783 **Figure 1.** Iridescent plumage is produced by nanostructures in the feather barbules. A vaned  
 784 feather (A) consists of branching structures where the barbules (B) are the interlocking  
 785 filaments. A cross-section of a barbule from an iridescent feather (C) reveals the intricate  
 786 nanostructure responsible for the color, consisting of layers of melanosomes in keratin (D).  
 787 Blue feather in A from Pixabay, licensed under Pixabay License (full details in Supp. Note  
 788 1).

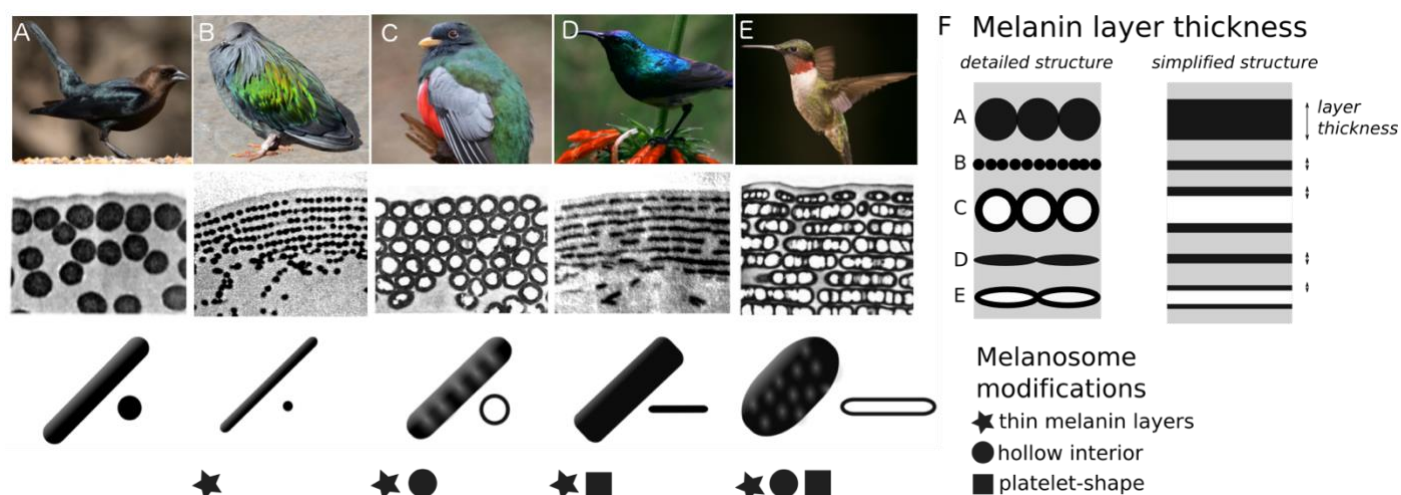

789 **Figure 2.** Iridescent feather nanostructures are diverse. Structures can vary both in  
 790 melanosome type and melanosome organization. There are five main types of melanosomes  
 791 (shown as schematics in bottom row, A-E) and two main types of structural organization  
 792 (shown by microscope images of barbule cross-sections, middle row: single-layered (A) and  
 793 photonic crystal (B-E)). A single-layered structure with thick solid rods (A) gives rise to the

794 dark, black-blue iridescence of a brown-headed cowbird (*Molothrus ater*). This type of  
795 structure generally gives rise to "weak" iridescent colors, with low color saturation and  
796 brightness. Photonic crystals (B-E) with multiple layers of melanosomes generally give rise  
797 to "brilliant" iridescent colors, with high saturation and brightness. Thin solid rods (B) in a  
798 multilayer configuration (also called a one-dimensional photonic crystal) produce the  
799 iridescent colors of the Nicobar pigeon (*Caloenas nicobarica*). In the elegant trogon (*Trogon*  
800 *elegans*), the iridescent green color is produced by hexagonally packed hollow rods (C).  
801 Sunbird (here the variable sunbird, *Cinnyris venustus*) barbules contain melanosomes stacked  
802 in multilayers, with solid platelet-shaped melanosomes serving as the building blocks (D).  
803 The fifth melanosome type is a hollow platelet (E), which forms multilayer configurations in  
804 many hummingbird species (here a ruby-throated hummingbird, *Archilochus colubris*). The  
805 five types of melanosomes are characterized by different combinations of three key  
806 modifications: thin melanin layers, hollowness and platelet shape, which are indicated as  
807 symbols under each melanosome type. Thin melanin layers are present in four melanosome  
808 types, but they are achieved in different ways, as is shown by the schematic in F. A  
809 simplified diagram of each melanosome type (F, right) shows how solid forms translate to a  
810 single melanin layer, while hollow forms create two thinner melanin layers intersected by an  
811 air-layer. All photographs (top row) are under a Public Domain License (details in Supp.  
812 Note 2). Transmission Electron Microscope images from Durrer (1977), reproduced with  
813 permission.  
814

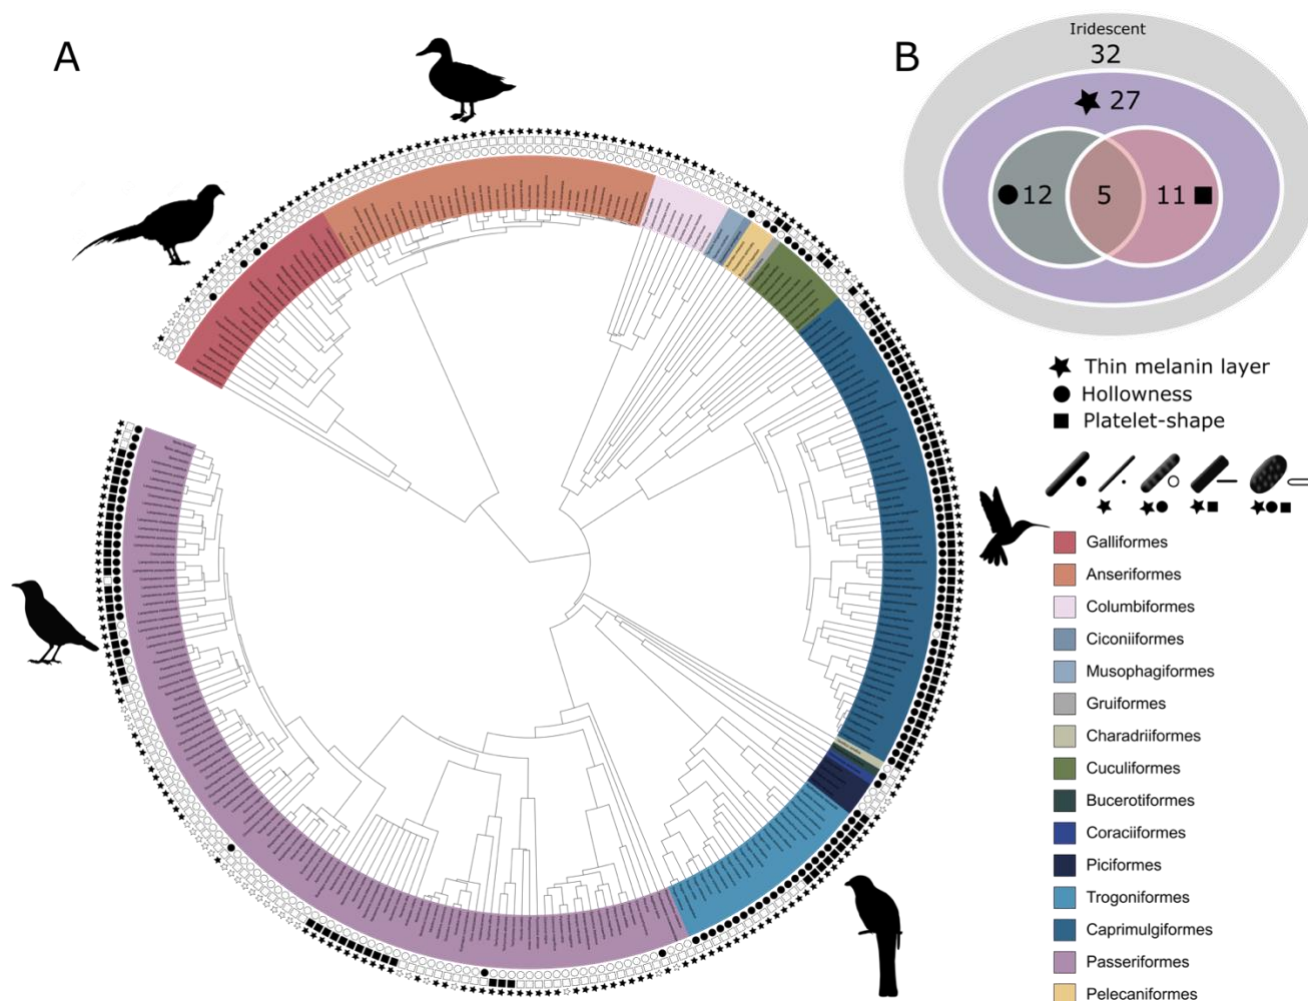

815 **Figure 3.** Evolutionary distribution of three key melanosome modifications in iridescent  
 816 structures: thin melanin layers (star), hollowness (circle) and platelet shape (square).  
 817 Schematics of melanosomes in the key show how combinations of modifications correspond  
 818 to each melanosome type. A) Melanosome modifications mapped to a phylogeny including  
 819 all species in the feather iridescence database (280 species, 26 species lacking data on  
 820 melanosome type excluded). Note that where data on melanin layer thickness was not  
 821 available for a species with hollow and/or platelet-shaped melanosomes, they were assumed  
 822 to have thin melanin layers, since all known structures do. Silhouettes shown for the five  
 823 families that are most well represented in the feather iridescence database (>20 species  
 824 represented in the database): Sturnidae, Phasianidae, Anatidae, Trogonidae and Trochilidae.  
 825 B) Venn diagram showing the number of bird families in the feather iridescence database  
 826 where each modification was present. The majority of bird families with iridescent plumage

827 studied have evolved thin melanin layers, and there are no hollow or platelet-shaped  
828 melanosomes which have not also evolved this modification. A similar number of families  
829 have hollow or platelet-shaped melanosomes, but only five families have evolved both  
830 modifications together. Note that this plot depicts the number of occurrences of each  
831 modification, not independent evolutionary origins. Silhouettes from Phylopic.org, licensed  
832 under a Public Domain License (full details in Supp. Note 3).

833

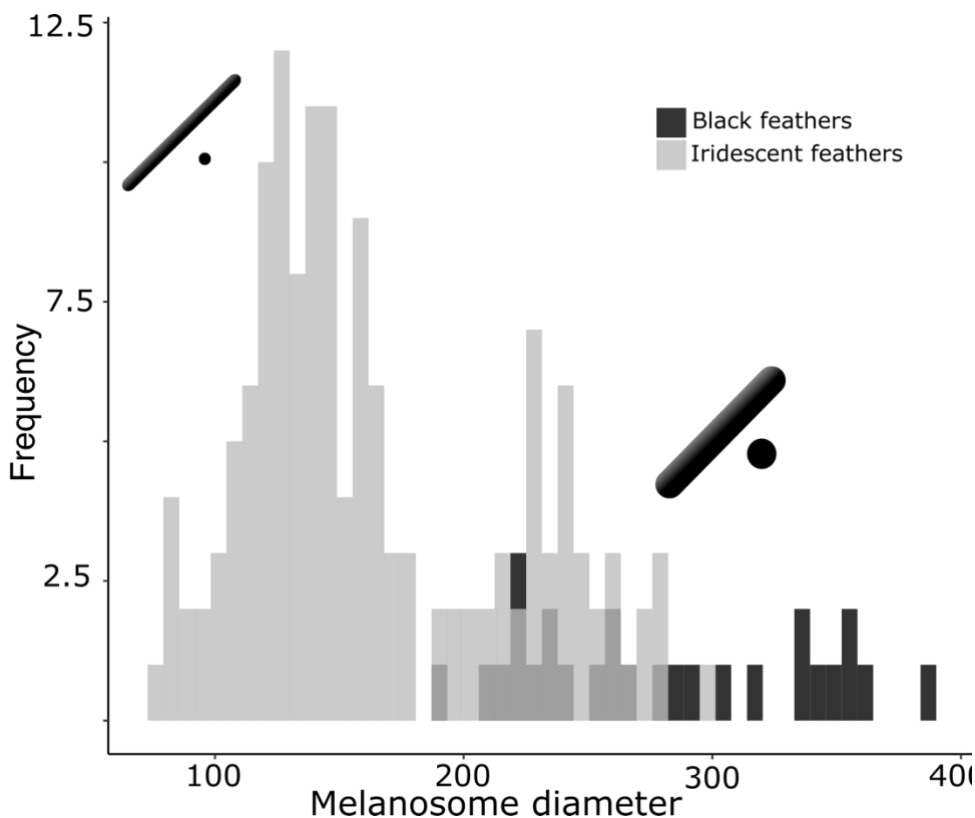

834 **Figure 4.** There are two distinct types of solid rods in iridescent structures: thick solid rods  
835 and thin solid rods. This is evident from the clear bimodal distribution shown by the  
836 histogram of melanosome diameters found among solid rods in the feather iridescence  
837 database (grey). Based on this distribution, we define "thin rods" as any solid rod with a  
838 diameter  $\leq 190$ nm. Plotted in black is the distribution of diameters from melanosomes in  
839 black feathers (data from Li et al. 2012), which overlaps with the distribution of thick solid  
840 rods in iridescent structures.

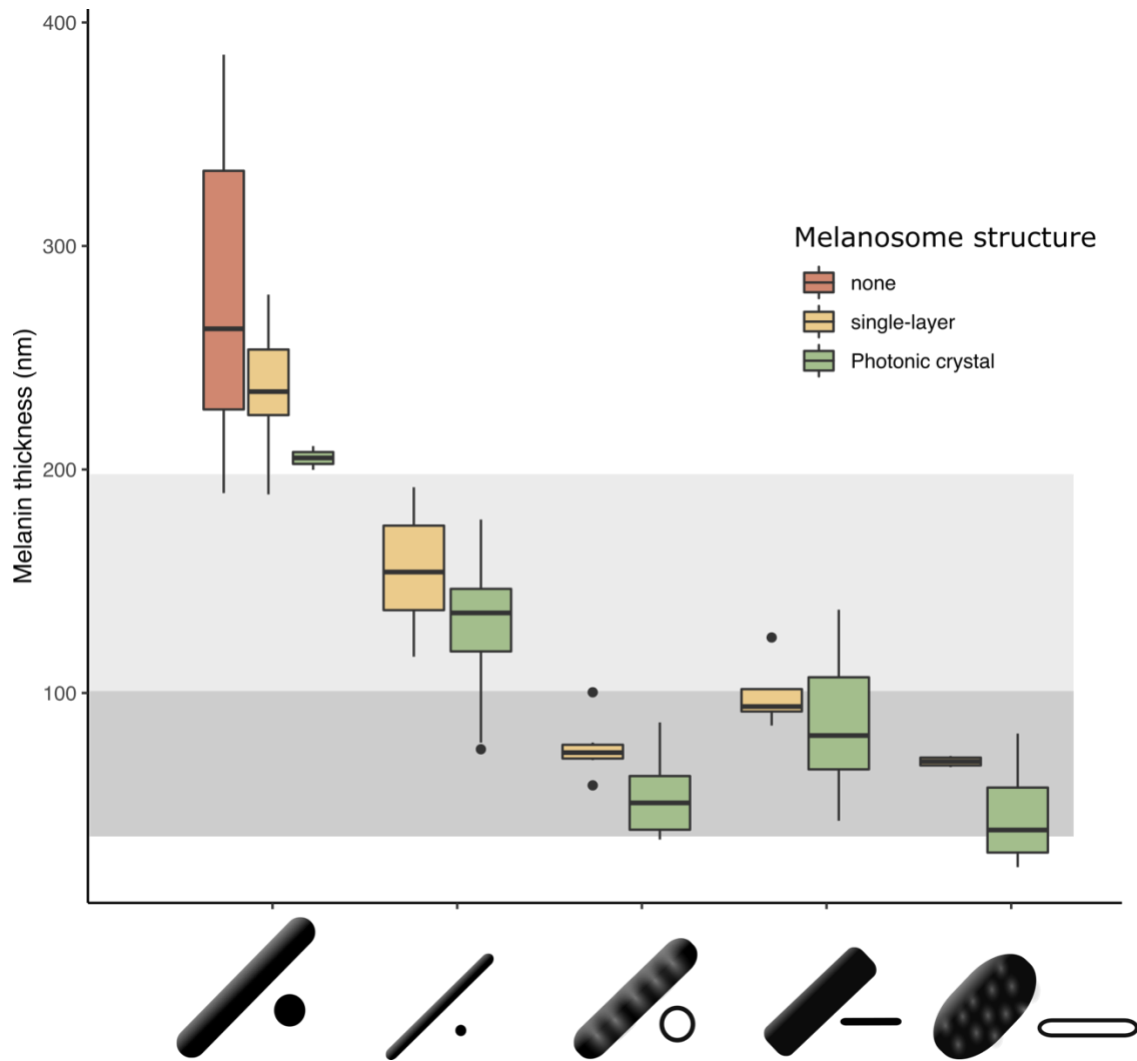

841

842

843 **Figure 5.** The thickness of melanin layers in brilliant iridescent structures has converged  
844 towards the theoretical optimal range, where optical thickness equals  $\frac{\lambda}{2}$  (light grey box, for  
845 bird-visible spectrum). Boxplot shows the distribution of melanin layer thickness for each  
846 melanosome type in single-layered structures (yellow) and photonic crystals (green) in the  
847 feather iridescence database. "None" corresponds to melanosomes in a black feather without  
848 organization. All melanosome types except thick solid rods, which are predominantly found  
849 in single-layered structures with weak iridescence, have converged towards an optical  
850 thickness of  $\frac{\lambda}{2}$ . Hollow and platelet forms often reach thicknesses closer to  $\frac{\lambda}{4}$ , which can in  
851 theory form ideal multilayers (dark grey box, for bird-visible spectrum).

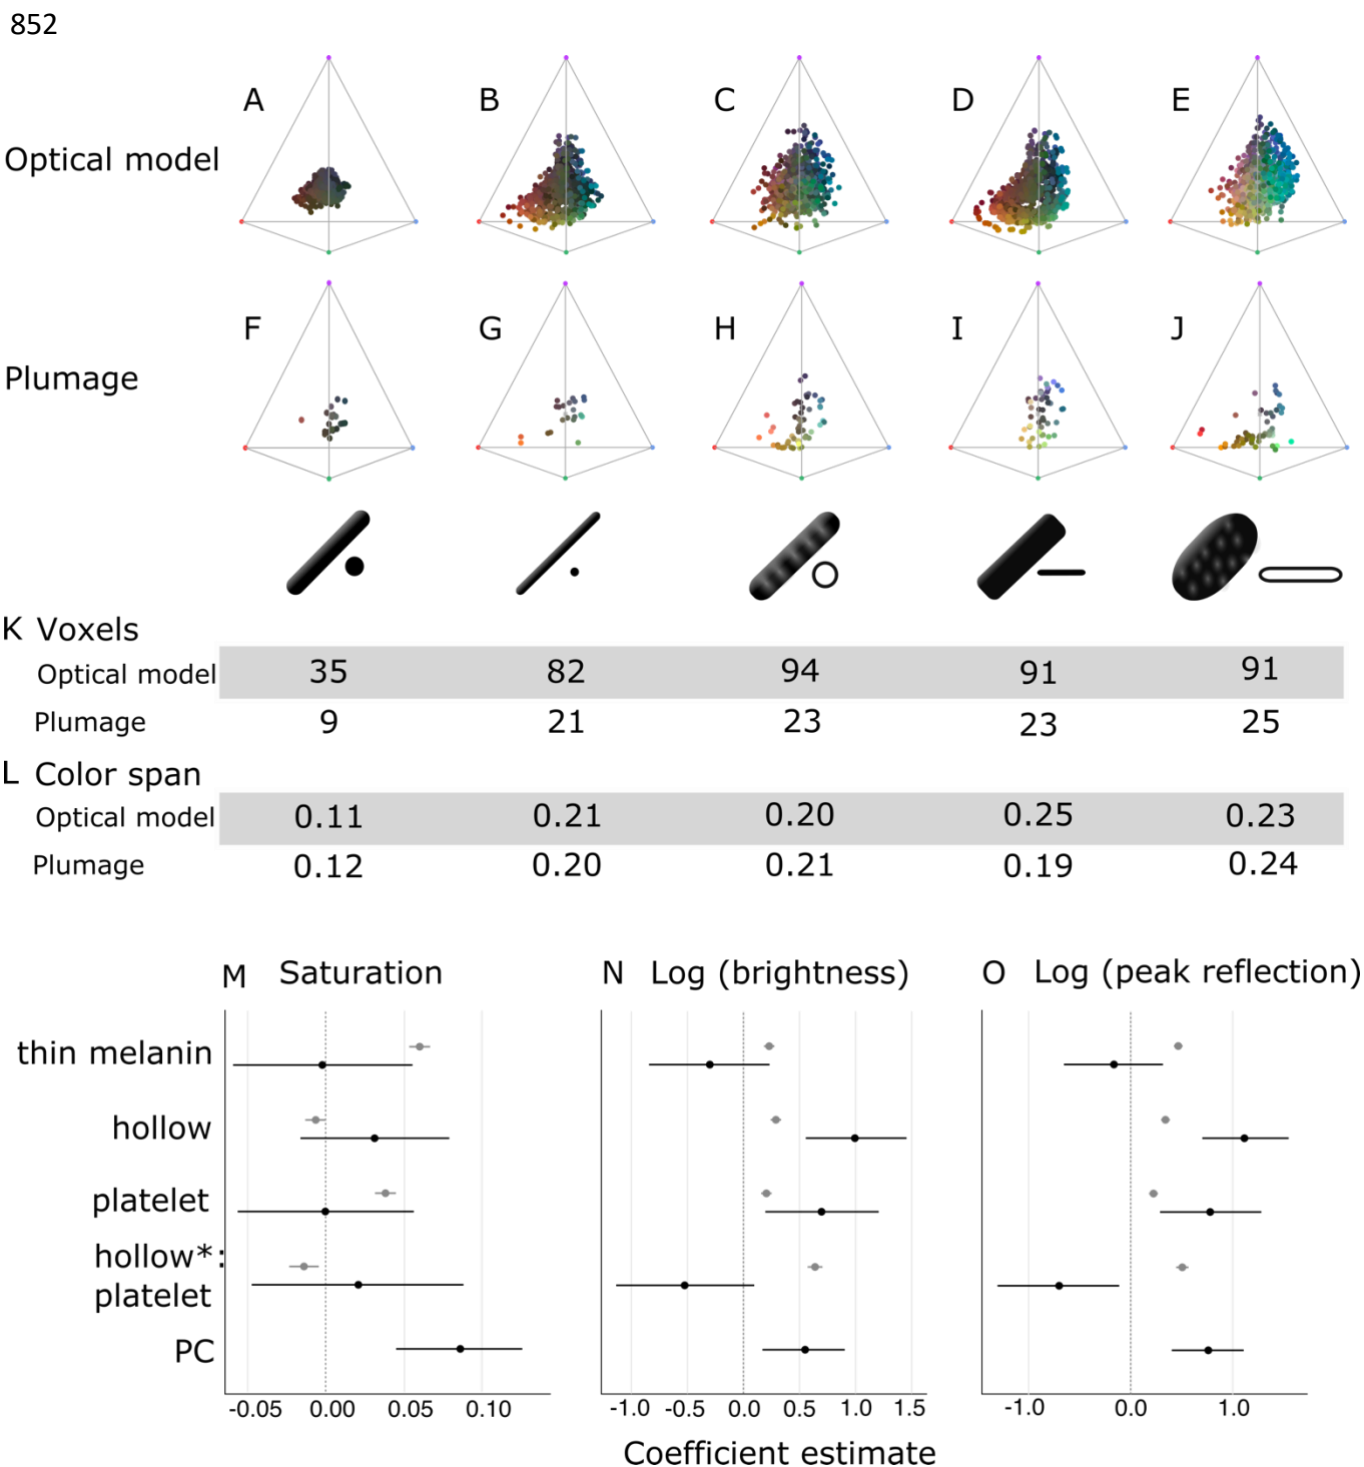

853

854 **Figure 6.** Optical effects of different melanosome modifications, as predicted by an optical  
 855 model and found in empirical plumage analysis. A-J show the color diversity for structures  
 856 with each type of melanosome represented in an avian tetrahedral color space (optical model,  
 857 A-E; plumage data F-J). Statistics for color diversity are presented in terms of the number of

858 occupied voxels (K) and mean color span (L) for both data sets. Thick solid rods produce  
859 colors of substantially lower diversity and saturation (A, F) than all melanosome types with  
860 thin melanin layers (B-E, G-J). In contrast, hollowness or platelet shape does not affect color  
861 diversity notably (C-E, H-J). M-O depict the estimates for the effects of each melanosome  
862 modification on saturation (M), log (brightness) (N) and log (peak reflection) (O), as  
863 predicted by linear models. The parameter PC described the variation explained by having a  
864 photonic crystal, which was used to control for variation in plumage data (see Results §4).  
865 Grey points show coefficient estimates for a model based on optical model simulations, and  
866 black dots the posterior coefficient estimates for a model based on the plumage data.  
867 Horizontal lines show 95% confidence intervals for estimates.

868

869

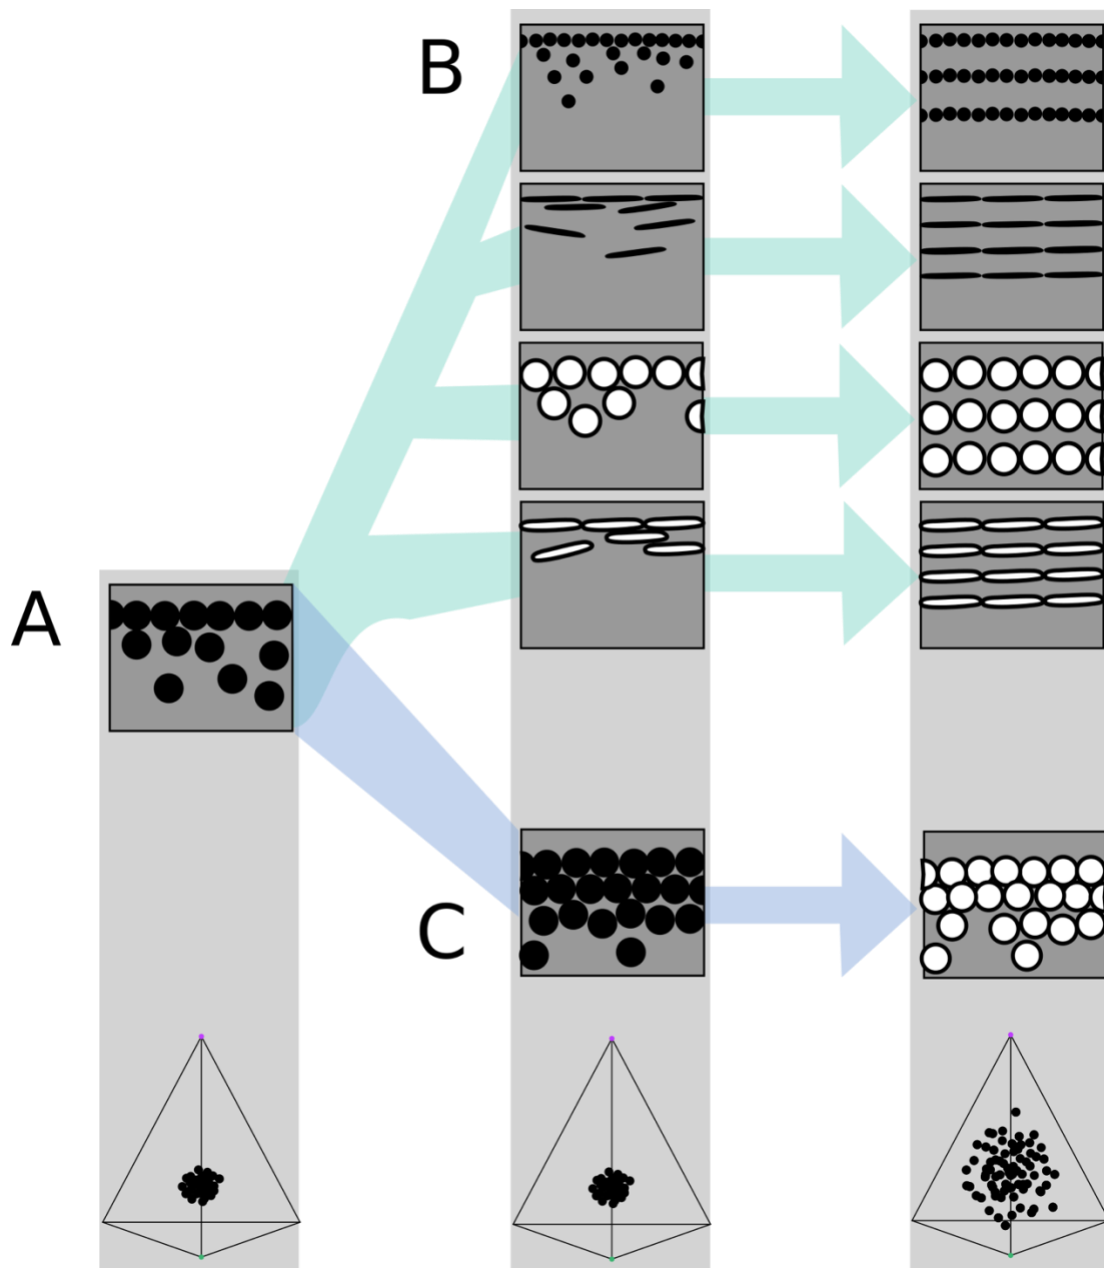

870

871 **Figure 7.** Hypothetical evolutionary paths to brilliant iridescence. Grey squares depict  
872 schematics of barbule cross-sections, showing the iridescent nanostructures within, while the  
873 tetrahedra below show hypothetical color diversity for each evolutionary "step", represented  
874 in avian color space. A) Assumed ancestral state for iridescent structures - a single-layered  
875 structure with thick solid rods. Note that a layer refers to a *continuous* layer of melanosomes;  
876 scattered or disorganized melanosomes often seen below a continuous single layer do not  
877 constitute additional layers. From this state, structures may either immediately evolve  
878 modified melanosomes in a single-layered structure (B) or first evolve multilayered,



879 hexagonal structuring of thick solid rods (C). Both of these states are expected to give a  
880 negligible advantage in terms of color saturation and diversity, as seen in the hypothetical  
881 color spaces corresponding to each stage (bottom). We argue that path B might initially be  
882 driven by selection for brighter colors, while path C could form spontaneously from higher  
883 concentrations of melanosomes in the barbule. Both paths can then evolve towards more  
884 brilliant forms (multilayers in B, modified melanosomes with thin melanin layers in C) which  
885 will drastically expand the possible color diversity.  
886

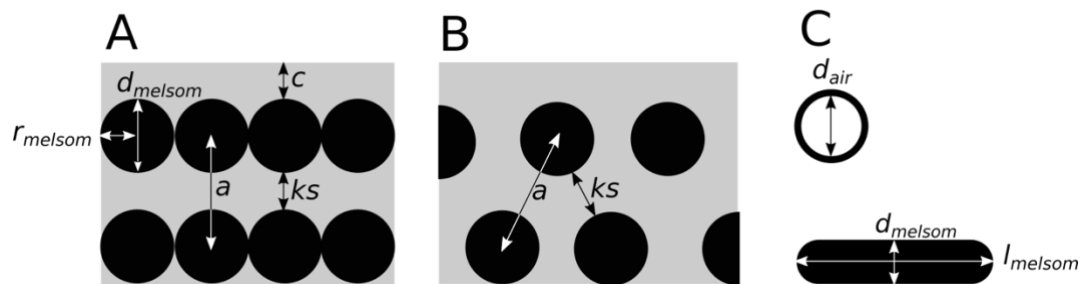

887  
888 **Figure 8.** Definitions of parameters used in the study, shown in schematics of cross-sections  
889 of iridescent structures: (A) laminar photonic crystal (multilayer); (B) hexagonal photonic  
890 crystal; and (C) isolated hollow and flat melanosomes. In (A),  $d_{melsom}$ : diameter of  
891 melanosome (shortest axis in flat melanosomes),  $r_{mel}$ : radius of melanosome ( $d_{melsom}/2$ ),  $c$ :  
892 thickness of keratin cortex,  $a$ : lattice spacing (center-center distance between melanosomes),  
893  $ks$ : keratin spacing (thickness of keratin layer between melanosomes at the thinnest point). In  
894 (B) keratin spacing ( $ks$ ) and lattice spacing ( $a$ ) is shown for a hexagonal photonic crystal. In  
895 (C),  $d_{air}$ : diameter of internal air pockets (shortest axis of air pockets in hollow platelets),  
896  $l_{melsom}$ : width of platelets. Melanin layer thickness is defined as  $d_{melsom}$  for solid forms, and  
897  $(d_{melsom} - d_{air})/2$  for hollow forms.

898

899

900 **References**

- 901 Abràmoff MD, Magalhães PJ, Ram SJ. 2004. Image processing with imageJ. *Biophotonics*  
902 *International* **11**:36–41. doi:10.1117/1.3589100
- 903 Ameijeiras-Alonso J, Crujeiras RM, Rodríguez-Casal A. 2018. Multimode: An R Package for  
904 Mode Assessment. *Preprint: arXiv* 1803.00472.
- 905 Andersson S, Prager M. 2006. Quantifying colors In: Hill GE, McGraw KJ, editors. Bird  
906 Coloration Vol. I: Mechanisms and Measurements. Cambridge, MA: Harvard  
907 University Press. pp. 90–147.
- 908 Auber L. 1957. The Distribution of Structural Colours and Unusual Pigments in the Class  
909 Aves. *Ibis* **99**:463–476. doi:10.1111/j.1474-919X.1957.tb01960.x
- 910 Brink DJ, van der Berg NG. 2004. Structural colours from the feathers of the bird *Bostrychia*  
911 *hagedash*. *Journal of Physics D: Applied Physics* **37**:813–818. doi:10.1088/0022-  
912 3727/37/5/025
- 913 Brodie J, Ingham CJ, Vignolini S. 2021. Does Structural Color Exist in True Fungi? *Journal*  
914 *of Fungi* **7**:141. doi:10.3390/jof7020141
- 915 Burt Jr. EH. 1979. Tips on wings and other things In: Burt Jr. EH, editor. The Behavioral  
916 Significance of Colour. New York: Garland STPM Press. pp. 75–125.
- 917 D’Alba L, Shawkey MD. 2019. Melanosomes: Biogenesis, Properties, and Evolution of an  
918 Ancient Organelle. *Physiological Reviews* **99**:1–19. doi:10.1152/physrev.00059.2017
- 919 Delhey K. 2015. The colour of an avifauna: A quantitative analysis of the colour of  
920 Australian birds. *Scientific Reports* **5**. doi:10.1038/srep18514
- 921 Doucet SM. 2006. Iridescent plumage in satin bowerbirds: structure, mechanisms and  
922 nanostructural predictors of individual variation in colour. *Journal of Experimental*  
923 *Biology* **209**:380–390. doi:10.1242/jeb.01988

- 924 Durrer H. 1977. Schillerfarben der Vogelfeder als Evolutionsproblem (PhD Thesis).  
925 University of Basel.
- 926 Durrer H. 1970. Schillerfarben der Stare (Sturnidae). *Journal für Ornithologie* **111**:133–153.
- 927 Durrer H. 1962. Schillerfarben der Nektarvögel (Nectariniidae). *Rev Suisse Zool* **69**:801–224.
- 928 Eliason CM, Bitton P-P, Shawkey MD. 2013. How hollow melanosomes affect iridescent  
929 colour production in birds. *Proceedings of the Royal Society B: Biological Sciences*  
930 **280**:20131505. doi:10.1098/rspb.2013.1505
- 931 Eliason CM, Maia R, Parra JL, Shawkey MD. 2020. Signal evolution and morphological  
932 complexity in hummingbirds (Aves: Trochilidae). *Evolution* **74**:447–458.  
933 doi:10.1111/evo.13893
- 934 Eliason CM, Maia R, Shawkey MD. 2015. Modular color evolution facilitated by a complex  
935 nanostructure in birds. *Evolution* **69**:357–367. doi:10.1111/evo.12575
- 936 Eliason CM, Shawkey MD. 2012. A photonic heterostructure produces diverse iridescent  
937 colours in duck wing patches. *Journal of The Royal Society Interface* **9**:2279–2289.  
938 doi:10.1098/rsif.2012.0118
- 939 Endler JA, Mielke PW. 2005. Comparing entire colour patterns as birds see them. *Biol J Linn*  
940 *Soc* **86**:405–431. doi:10.1111/j.1095-8312.2005.00540.x
- 941 Fisher NI, Marron JS. 2001. Mode testing via the excess mass estimate. *Biometrika* **88**:499–  
942 517. doi:10.1093/biomet/88.2.499
- 943 Gammie KK. 2013. The evolution of iridescent plumage in the Galliformes: Proximate  
944 mechanisms and ultimate functions (PhD Thesis). University of Windsor.
- 945 Garland T Jr, Dickerman AW, Janis CM, Jones JA. 1993. Phylogenetic Analysis of  
946 Covariance by Computer Simulation. *Systematic Biology* **42**:265–292.  
947 doi:10.1093/sysbio/42.3.265

- 948 Goldsmith TH. 1990. Optimization, Constraint, and History in the Evolution of Eyes. *The*  
949 *Quarterly Review of Biology* **65**:281–322. doi:10.1086/416840
- 950 Goldstein G, Flory KR, Browne BA, Majid S, Ichida JM, Burt Jr. EH. 2004. Bacterial  
951 Degradation of Black and White Feathers. *Auk* **121**:656–659.  
952 doi:10.1093/auk/121.3.656
- 953 Greenewalt CH, Brandt W, Friel DD. 1960. Iridescent Colors of Hummingbird Feathers.  
954 *Journal of the Optical Society of America* **50**:1005. doi:10.1364/JOSA.50.001005
- 955 Gruson H, Elias M, Andraud C, Djediat C, Berthier S, Doutrelant C, Gomez D. 2019.  
956 Hummingbird iridescence: an unsuspected structural diversity influences colouration  
957 at multiple scales. *Preprint: bioRxiv* 699744. doi:10.1101/699744
- 958 Hackett SJ, Kimball RT, Reddy S, Bowie RCK, Braun EL, Braun MJ, Chojnowski JL, Cox  
959 WA, Han K-L, Harshman J, Huddleston CJ, Marks BD, Miglia KJ, Moore WS,  
960 Sheldon FH, Steadman DW, Witt CC, Yuri T. 2008. A Phylogenomic Study of Birds  
961 Reveals Their Evolutionary History. *Science* **320**:1763–1768.  
962 doi:10.1126/science.1157704
- 963 Hadfield DJ. 2010. MCMC Methods for Multi-Response Generalized Linear Mixed Models:  
964 The MCMCglmm R Package. *Journal of Statistical Software* **33**:1–22.
- 965 Hart NS. 2001. The Visual Ecology of Avian Photoreceptors. *Progress in Retinal and Eye*  
966 *Research* **20**:675–703. doi:10.1016/S1350-9462(01)00009-X
- 967 Jetz W, Thomas GH, Joy JB, Hartmann K, Mooers AO. 2012. The global diversity of birds in  
968 space and time. *Nature* **491**:444–448. doi:10.1038/nature11631
- 969 Joannopoulos JD, Johnson SG, Winn JN, Meade RD. 2008. Photonic Crystals: Molding the  
970 Flow of Light, 2nd ed. Singapore: Princeton University Press.
- 971 Jones CD, Osorio D. 2004. Discrimination of oriented visual textures by poultry chicks.  
972 *Vision Research* **44**:83–89. doi:10.1016/j.visres.2003.08.014

- 973 Kinoshita S. 2008. Structural Colors in the Realm of Nature. Singapore: World Scientific  
974 Publishing.
- 975 Kinoshita S, Yoshioka S, Miyazaki J. 2008. Physics of structural colors. *Rep Prog Phys*  
976 **71**:076401. doi:10.1088/0034-4885/71/7/076401
- 977 Land MF. 1972. The physics and biology of animal reflectors. *Progress in Biophysics and*  
978 *Molecular Biology* **24**:75–106. doi:10.1016/0079-6107(72)90004-1
- 979 Lee E, Miyazaki J, Yoshioka S, Lee H, Sugita S. 2012. The weak iridescent feather color in  
980 the Jungle Crow *Corvus macrorhynchos*. *Ornithological Science* **11**:59–64.  
981 doi:10.2326/osj.11.59
- 982 Li Q, Clarke JA, Gao K-Q, Zhou C-F, Meng Q, Li D, D’Alba L, Shawkey MD. 2014.  
983 Melanosome evolution indicates a key physiological shift within feathered dinosaurs.  
984 *Nature* **507**:350–353. doi:10.1038/nature12973
- 985 Li Q, Gao K-Q, Meng Q, Clarke JA, Shawkey MD, D’Alba L, Pei R, Ellison M, Norell MA,  
986 Vinther J. 2012. Reconstruction of Microraptor and the evolution of iridescent  
987 plumage. *Science* **335**:1215–1219. doi:10.1126/science.1213780
- 988 Ligon RA, Diaz CD, Morano JL, Troscianko J, Stevens M, Moskeland A, Laman TG, Iii ES.  
989 2018. Evolution of correlated complexity in the radically different courtship signals of  
990 birds-of-paradise. *PLOS Biology* **16**:e2006962. doi:10.1371/journal.pbio.2006962
- 991 Maia R, Caetano JVO, Bao SN, Macedo RH. 2009. Iridescent structural colour production in  
992 male blue-black grassquit feather barbules: the role of keratin and melanin. *Journal of*  
993 *The Royal Society Interface* **6**:S203–S211. doi:10.1098/rsif.2008.0460.focus
- 994 Maia R, Eliason CM, Bitton PP, Doucet SM, Shawkey MD. 2013a. pavo: An R package for  
995 the analysis, visualization and organization of spectral data. *Methods in Ecology and*  
996 *Evolution* **4**:906–913. doi:10.1111/2041-210X.12069

- 997 Maia R, Macedo RHF, Shawkey MD. 2012. Nanostructural self-assembly of iridescent  
998 feather barbules through depletion attraction of melanosomes during keratinization.  
999 *Journal of The Royal Society Interface* **9**:734–743. doi:10.1098/rsif.2011.0456
- 1000 Maia R, Rubenstein DR, Shawkey MD. 2013b. Key ornamental innovations facilitate  
1001 diversification in an avian radiation. *Proceedings of the National Academy of*  
1002 *Sciences* **110**:10687–10692. doi:10.1073/pnas.1220784110
- 1003 Nordén KK, Faber JW, Babarović F, Stubbs TL, Selly T, Schiffbauer JD, Štefanić PP, Mayr  
1004 G, Smithwick FM, Vinther J. 2019. Melanosome diversity and convergence in the  
1005 evolution of iridescent avian feathers—Implications for paleocolor reconstruction.  
1006 *Evolution* **73**:15–27. doi:10.1111/evo.13641
- 1007 Ödeen A, Håstad O. 2003. Complex Distribution of Avian Color Vision Systems Revealed  
1008 by Sequencing the SWS1 Opsin from Total DNA. *Molecular Biology and Evolution*  
1009 **20**:855–861. doi:10.1093/molbev/msg108
- 1010 Oskooi AF, Roundy D, Ibanescu M, Bermel P, Joannopoulos JD, Johnson SG. 2010. Meep:  
1011 A flexible free-software package for electromagnetic simulations by the FDTD  
1012 method. *Computer Physics Communications* **181**:687–702.  
1013 doi:10.1016/j.cpc.2009.11.008
- 1014 Parra JL. 2010. Color Evolution in the Hummingbird Genus *Coeligena*. *Evolution* **64**:324–  
1015 335. doi:<https://doi.org/10.1111/j.1558-5646.2009.00827.x>
- 1016 Prum RO. 2006. Anatomy, physics, and evolution of structural colors In: Hill GE, McGraw  
1017 KJ, editors. *Bird Coloration*. Cambridge, MA: Harvard University Press. pp. 295–353.
- 1018 Quintero E, Espinosa de los Monteros A. 2011. Microanatomy and evolution of the  
1019 nanostructures responsible for iridescent coloration in Trogoniformes (Aves). *Org*  
1020 *Divers Evol* **11**:237. doi:10.1007/s13127-011-0049-z

- 1021 R Core team. 2019. R: A language and environment for statistical computing. R foundation  
1022 for statistical computing , Vienna, Austria. URL <http://www.R-project.org/>.
- 1023 Revell LJ. 2012. phytools: An R package for phylogenetic comparative biology (and other  
1024 things). *Methods in Ecology and Evolution* **3**:217–223. doi:10.1111/j.2041-  
1025 210X.2011.00169.x
- 1026 Saranathan V, Finet C. 2020. Cellular and Developmental Basis of Avian Structural  
1027 Coloration. *Preprint: arXiv:201210338*.
- 1028 Shawkey MD, Hauber ME, Estep LK, Hill GE. 2006. Evolutionary transitions and  
1029 mechanisms of matte and iridescent plumage coloration in grackles and allies  
1030 (Icteridae). *Journal of The Royal Society Interface* **3**:777–786.  
1031 doi:10.1098/rsif.2006.0131
- 1032 Stavenga DG, Leertouwer HL, Osorio DC, Wilts BD. 2015. High refractive index of melanin  
1033 in shiny occipital feathers of a bird of paradise. *Light: Science and Applications*  
1034 **4**:e243. doi:10.1038/lsa.2015.16
- 1035 Stavenga DG, Leertouwer HL, Wilts BD. 2018. Magnificent magpie colours by feathers with  
1036 layers of hollow melanosomes. *Journal of Experimental Biology* **221**.
- 1037 Stoddard MC, Prum RO. 2008. Evolution of Avian Plumage Color in a Tetrahedral Color  
1038 Space: A Phylogenetic Analysis of New World Buntings. *The American Naturalist*  
1039 **171**:755–776. doi:10.1086/587526
- 1040 Yin H, Shi L, Sha J, Li Y, Qin Y, Dong B, Meyer S, Liu X, Zhao L, Zi J. 2006. Iridescence in  
1041 the neck feathers of domestic pigeons. *Physical Review E* **74**.  
1042 doi:10.1103/PhysRevE.74.051916
- 1043 Zi J, Yu X, Li Y, Hu X, Xu C, Wang X, Liu X, Fu R. 2003. Coloration strategies in peacock  
1044 feathers. *Proceedings of the National Academy of Sciences* **100**:12576–12578.  
1045 doi:10.1073/pnas.2133313100
